# Supplementary material
Source: ML conference proceedings conference paper supplement (https://openreview.net/forum?id=vmjckXzRXmh)
Supplement: supplementary_material [file attachment]

---

# Beyond Separability: Analyzing the Linear Transferability of Contrastive Representations to Related Subpopulations

---

Anonymous Author(s)

Affiliation

Address

email

## Abstract

1 Contrastive learning is a highly effective method for learning representations from  
2 unlabeled data. Recent works show that contrastive representations can transfer  
3 across domains, leading to simple state-of-the-art algorithms for unsupervised  
4 domain adaptation. In particular, a linear classifier trained to separate the  
5 representations on the source domain can also predict classes on the target domain  
6 accurately, even though the representations of the two domains are far from each  
7 other. We refer to this phenomenon as *linear transferability*. This paper analyzes  
8 when and why contrastive representations exhibit linear transferability in a general  
9 unsupervised domain adaptation setting. We prove that linear transferability can  
10 occur when data from the same class in different domains (e.g., photo dogs and  
11 cartoon dogs) are more related with each other than data from different classes in  
12 different domains (e.g., photo dogs and cartoon cats) are. Our analyses are in a  
13 realistic regime where the source and target domains can have unbounded density  
14 ratios and be weakly related, and they have distant representations across domains.

## 15 1 Introduction

16 In recent years, contrastive learning and related ideas have been shown to be highly effective for  
17 representation learning [Chen et al., 2020a,b, He et al., 2020, Caron et al., 2020, Chen et al., 2020c,  
18 Gao et al., 2021, Su et al., 2021, Chen and He, 2020]. Contrastive learning trains representations on  
19 *unlabeled data* by encouraging positive pairs (e.g., augmentations of the same image) to have  
20 closer representations than negative pairs (e.g., augmentations of two random images). The  
21 learned representations are almost *linearly separable*: one can train a linear classifier on top of  
22 the fixed representations and achieve strong performance on many natural downstream tasks [Chen  
23 et al., 2020a]. Prior theoretical works analyze contrastive learning by proving that semantically  
24 similar datapoints (e.g., datapoints from the same class) are mapped to geometrically nearby  
25 representations [Arora et al., 2019, Tosh et al., 2020, 2021, HaoChen et al., 2021]. In other words,  
26 representations form clusters in the Euclidean space that respect the semantic similarity; therefore,  
27 they are linearly separable for downstream tasks where datapoints in the same semantic cluster have  
28 the same label.

29 Intriguingly, recent empirical works show that contrastive representations carry richer information  
30 *beyond* the cluster memberships—they can transfer across domains in a linear way as elaborated  
31 below. Contrastive learning is used in many unsupervised domain adaptation algorithms [Thota  
32 and Leontidis, 2021, Sagawa et al., 2022] and the transferability leads to simple state-of-the-art  
33 algorithms [Shen et al., 2022, Park et al., 2020, Wang et al., 2021]. In particular, Shen et al. [2022]  
34 observe that the relationship between two clusters can be captured by their relative positions in

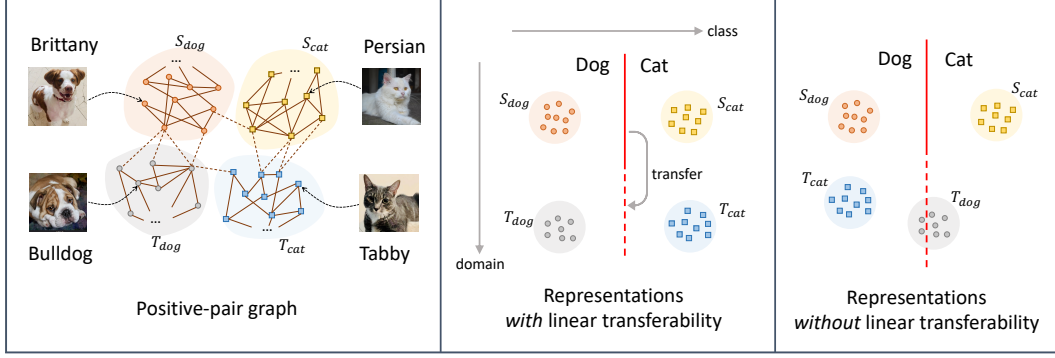

Figure 1: **The linear transferability of representations.** We demonstrate the linear transferability of representations when the unlabeled data contains images of two breeds of dogs (Brittanys, Bulldogs) and two breeds of cats (Persians, Tabbies). **Left:** A visualization of the positive-pair graph with four semantic clusters. Inter-cluster edges (dashed) have a much smaller weight than intra-cluster edges (solid). Inter-cluster edges between two breeds of dogs (or cats) have more weight than that between a dog cluster and a cat cluster. **Middle and right:** A visualization of two different types of representations: both have linear separability, but only the middle one has linear transferability. The red line is the decision boundary of a dog-vs-cat linear classifier trained in the representation space on *labeled* Brittanys ( $S_{\text{dog}}$ ) vs. Persians ( $S_{\text{cat}}$ ) images. The representation has linear transferability if this classifier is accurate on *unlabeled* Bulldogs ( $T_{\text{dog}}$ ) vs. Tabbies ( $T_{\text{cat}}$ ) images.

the representation space. For instance, as shown in Figure 1 (middle), suppose  $S_{\text{dog}}$  and  $S_{\text{cat}}$  are two classes in a *source* domain (e.g., Brittany dogs and Persian cats), and  $T_{\text{dog}}$  and  $T_{\text{cat}}$  are two classes in a *target* domain (e.g., Bulldogs and Tabby cats). A *linear* classifier trained to separate the representations of  $S_{\text{dog}}$  and  $S_{\text{cat}}$  turns out to classify  $T_{\text{dog}}$  and  $T_{\text{cat}}$  as well. This suggests the four clusters of representations are not located in the Euclidean space randomly (e.g., as in Figure 1 (right)), but rather in a more aligned position as in Figure 1 (middle). We refer to this phenomenon as the *linear transferability* of contrastive representations.

This paper analyzes when and why contrastive representations exhibit linear transferability in a general unsupervised domain adaptation setting. Evidently, linear transferability can only occur when clusters corresponding to the same class in two domains (e.g., Brittany dogs and Bulldogs) are somewhat *related* with each other. Somewhat surprisingly, we found that a weak relationship suffices: linear transferability occurs as long as corresponding classes in different domains are more related than different classes in different domains. Concretely, under this assumption (Assumptions 3.1 or 3.3), a linear head learned with labeled data on one domain (Algorithm 1) can successfully predict the classes on the other domain (Theorems 3.2 and 3.4). Notably, our analysis provably shows that representations from contrastive learning do not only encode cluster identities but also capture the inter-cluster relationship, hence explains the empirical success of contrastive learning for domain adaptation.

Compared to previous theoretical works on unsupervised domain adaptation [Shimodaira, 2000, Huang et al., 2006, Sugiyama et al., 2007, Gretton et al., 2008, Ben-David et al., 2010, Mansour et al., 2009, Kumar et al., 2020, Chen et al., 2020d, Cai et al., 2021], our results analyze a modern, practical algorithm with weaker and more realistic assumptions. We do not require bounded density ratios or overlap between the source and target domains, which were assumed in some classical works [Sugiyama et al., 2007, Ben-David et al., 2010, Zhang et al., 2019, Zhao et al., 2019]. Another line of prior works [Kumar et al., 2020, Chen et al., 2020d] assume that data is Gaussian or near-Gaussian, whereas our result allows more general data distribution. Cai et al. [2021] analyze pseudolabeling algorithms for unsupervised domain adaptation, but require that the same-class cross-domain data are more related with each other (i.e., more likely to form positive pairs) than cross-class same-domain data are. We analyze a contrastive learning algorithm with strong empirical performance, and only require that the same-class cross-domain data are more related with each other than cross-class *cross-domain* data, which is intuitively and empirically more realistic as shown in Shen et al. [2022]. (See related work and discussion below Assumption 3.1 for details).

Technically, we significantly extend the framework of HaoChen et al. [2021] to allow distribution shift—our setting only has labels on one subpopulation of the data (the source domain). Studying transferability to unlabeled subpopulations requires both novel assumptions (Assumptions 3.1 and 3.3) and novel analysis techniques (as discussed in Section 4).

Our analysis also introduces a variant of the linear probe—instead of training the linear head with the logistic loss, we learn it by directly computing the average representations within a class, multiplied by a preconditioner matrix (Algorithm 1). We empirically test this linear classifier on benchmark datasets and show that it achieves superior domain adaptation performance in Section 5.

**Additional Related Works.** A number of papers have analyzed the linear separability of representations from contrastive learning [Arora et al., 2019, Tosh et al., 2020, 2021, HaoChen et al., 2021] and self-supervised learning [Lee et al., 2020], whereas we analyze the linear transferability. Shen et al. [2022] also analyze the linear transferability but only for toy examples where the data is generated by a stochastic block model. Their technique requires a strong symmetry of the positive-pair graph (which likely does not hold in practice) so that top eigenvectors can be analytically derived. Our analysis is much more general and does not rely on explicit, clean form of the eigenvectors (which is impossible for general graphs).

Empirically, pre-training on a larger unlabeled dataset and then fine-tuning on a smaller labeled dataset is one of the most successful approaches for handling distribution shift [Blitzer et al., 2007, Ziser and Reichart, 2018, 2017, Ben-David et al., 2020, Chen et al., 2012, Xie et al., 2020, Jean et al., 2016, Hendrycks et al., 2020, Kim et al., 2022, Kumar et al., 2022, Sagawa et al., 2022, Thota and Leontidis, 2021, Shen et al., 2022]. Recent advances in the scale of unlabeled data, such as in BERT and CLIP, have increased the importance of this approach [Wortsman et al., 2022, 2021]. Despite the empirical progress, there has been limited theoretical understanding of why pre-training helps domain shift. Our work provides the first analysis that shows pre-trained representations with a supervised linear head trained on one domain can provably generalize to another domain.

## 2 Preliminaries

In this section, we introduce the contrastive loss, define the positive-pair graph, and introduce the basic assumptions on the clustering structure in the positive-pair graph.

**Positive pairs.** Contrastive learning algorithms rely on the notion of “positive pairs”, which are pairs of semantically similar/related data. Let  $\mathcal{X}$  be the set of population data and  $P_+$  be the distribution of positive pairs of data satisfying  $P_+(x, x') = P_+(x', x)$  for any  $x, x' \in \mathcal{X}$ . We note that though a positive pair typically consists of semantically related data, the vast majority of semantically related pairs are *not* positive pairs. In the context of computer vision problems [Chen et al., 2020a], these pairs are usually generated via data augmentation on the same image.

For the ease of exposition, we assume  $\mathcal{X}$  is a finite but large set (e.g., all real vectors in  $\mathbb{R}^d$  with bounded precision) of size  $N$ . We use  $P_{\mathcal{X}}$  to denote the marginal distribution of  $P_+$ , i.e.,  $P_{\mathcal{X}}(x) := \sum_{x' \in \mathcal{X}} P_+(x, x')$ . Following the terminology in the literature [Arora et al., 2019], we call  $(x, x')$  a “negative pair” if  $x$  and  $x'$  are independent random samples from  $P_{\mathcal{X}}$ .

**Generalized spectral contrastive loss.** Contrastive learning trains a representation function (feature extractor) by minimizing a certain form of contrastive loss. Formally, let  $f : \mathcal{X} \rightarrow \mathbb{R}^k$  be a mapping from data to  $k$ -dimensional features. In this paper, we consider a more general version of the spectral contrastive loss proposed in HaoChen et al. [2021]. Let  $I_{k \times k}$  be the  $k$ -dimensional identity matrix. We consider the following loss with regularization strength  $\sigma > 0$ :

$$\mathcal{L}_{\sigma}(f) = \mathbb{E}_{(x, x^+) \sim P_+} [\|f(x) - f(x^+)\|_2^2] + \sigma \cdot R(f), \quad (1)$$

where the regularizer is defined as  $R(f) = \left\| \mathbb{E}_{x \sim P_{\mathcal{X}}} [f(x)f(x)^{\top}] - I_{k \times k} \right\|_F^2$ . The loss  $\mathcal{L}_{\sigma}$  intuitively minimizes the closeness of positive pairs via its first term, while regularizing the representations’ covariance to be identity, avoiding all the representations to collapse to the same point. Simple algebra shows that  $\mathcal{L}_{\sigma}$  recovers the original spectral contrastive loss when  $\sigma = 1$  (see Proposition B.1 for a formal derivation). We note that this loss is similar in spirit to the recently proposed Barlow Twins loss [Zbontar et al., 2021].

**The positive-pair graph.** One useful way to think of positive pairs is through a graph defined by their distribution. Let the *positive-pair graph* be a weighted undirected graph  $G(\mathcal{X}, w)$  such that the vertex set is  $\mathcal{X}$ , and for  $x, x' \in \mathcal{X}$ , the undirected edge  $(x, x')$  has weight  $w(x, x') = P_+(x, x')$ . This graph was introduced by HaoChen et al. [2021] as the augmentation graph when the positive pairs are generated from data augmentation. We introduce a new name to indicate the more general applications of the graph into other use cases of contrastive learning (e.g. see Gao et al. [2021]). We use  $w(x) = P_{\mathcal{X}}(x) = \sum_{x' \in \mathcal{X}} w(x, x')$  to denote the total weight of edges connected to a vertex  $x$ . We call  $\bar{A} \in \mathbb{R}^{N \times N}$  the *normalized adjacency matrix* of  $G(\mathcal{X}, w)$  if  $\bar{A}_{xx'} = w(x, x') / \sqrt{w(x)w(x')}$ ,<sup>1</sup> and call  $\mathcal{L} := I_{N \times N} - \bar{A}$  the *Laplacian* of  $G(\mathcal{X}, w)$ .

## 2.1 Clustering assumptions

Previous work accredits the success of contrastive learning to the clustering structure of the positive-pair graph—because the positive pairs connect data with similar semantic contents, the graph can be partitioned into many semantically meaningful clusters. To formally describe the clustering structure of the graph, we will use the notion of expansion. For any subset  $A$  of vertices, let  $w(A) \triangleq \sum_{x \in A} w(x)$  be the total weights of vertices in  $A$ . For any subsets  $A, B$  of vertices, let  $w(A, B) \triangleq \sum_{x \in A, x' \in B} w(x, x')$  be the total weights between set  $A$  and  $B$ . We abuse notation and use  $w(x, B)$  to refer to  $w(\{x\}, B)$  when the first set is a singleton.

**Definition 2.1** (Expansion). *Let  $A, B$  be two disjoint subsets of  $\mathcal{X}$ . We use  $\phi(A, B)$ ,  $\bar{\phi}(A, B)$  and  $\underline{\phi}(A, B)$  to denote the expansion, max-expansion and min-expansion from  $A$  to  $B$  respectively, defined as*

$$\phi(A, B) = \frac{w(A, B)}{w(A)}, \quad \bar{\phi}(A, B) = \max_{x \in A} \frac{w(x, B)}{w(x)}, \quad \underline{\phi}(A, B) = \min_{x \in A} \frac{w(x, B)}{w(x)} \quad (2)$$

Note that  $\underline{\phi}(A, B) \leq \phi(A, B) \leq \bar{\phi}(A, B)$ .

Intuitively,  $\phi(A, B)$  is the average proportion of edges adjacent to vertices in  $A$  that go to  $B$ , whereas the max-(min)-expansion is an upper (lower) bound of this proportion for each  $x \in A$ .

Our basic assumption on the positive-pair graph is that the vertex set  $\mathcal{X}$  can be partitioned into  $m$  groups  $C_1, \dots, C_m$  with small connections (expansions) across each other.

**Assumption 2.2** (Cross-cluster connections). *For some  $\alpha \in (0, 1)$ , we assume that the vertices of the positive-pair graph  $G$  can be partitioned into  $m$  disjoint clusters  $C_1, \dots, C_m$  such that for any  $i \in [m]$ ,*

$$\bar{\phi}(C_i, \mathcal{X} \setminus C_i) \leq \alpha \quad (3)$$

We will mostly work with the regime where  $\alpha \ll 1$ . Intuitively, each  $C_i$  corresponds to all the data with a certain semantic meaning or a class of interest. For instance,  $C_i$  may contain dogs from a certain breed. Our assumption is slightly stronger than in HaoChen et al. [2021]. In particular, they assume that the average expansions cross clusters is small, i.e.,  $\sum_{i \in [m]} \phi(C_i, \mathcal{X} \setminus C_i) \cdot w(C_i) \leq \alpha$ , whereas we assume that the max-expansion is smaller than  $\alpha$  for each cluster. In fact, since  $\sum_{i \in [m]} w(C_i) = 1$  and  $\phi(C_i, \mathcal{X} \setminus C_i) \leq \bar{\phi}(C_i, \mathcal{X} \setminus C_i)$ , Assumption 2.2 directly implies their assumption. However, we note that Assumption 2.2 is still realistic in many domains. For instance, any bulldog  $x$  has way more neighbors that are still bulldogs than neighbors that are Brittany dog, which suggests the max-expansion between bulldogs and Brittany dogs is small.

We also introduce the following assumption about intra-cluster expansion that guarantees each cluster can not be broken into two well-separated sub-clusters.

**Assumption 2.3** (Intra-cluster conductance). *For all  $i \in [m]$ , assume the conductance of the subgraph restricted to  $C_i$  is large, that is, every subset  $A$  of  $C_i$  with at most half the size of  $C_i$  expands to the rest:*

$$\forall A \subset C_i \text{ satisfying } w(A) \leq w(C_i)/2, \phi(A, C_i \setminus A) \geq \gamma. \quad (4)$$

We have  $\gamma < 1$  and we typically work with the regime where  $\gamma$  is decently large (e.g.,  $\Omega(1)$ , or inverse polynomial in dimension)<sup>2</sup> and much larger than the cross-cluster connections  $\alpha$ . This is the

<sup>1</sup>We index  $\bar{A}$  by  $(x, x') \in \mathcal{X} \times \mathcal{X}$ . Generally, we will index the  $N$ -dimensional axis of an array by  $x \in \mathcal{X}$ .

<sup>2</sup>E.g., suppose each cluster's distribution is a Gaussian distribution with covariance  $I$ , and the data augmentation is Gaussian blurring with a covariance  $\frac{1}{d} \cdot I$ , then the intra-cluster expansion is  $\Omega(1)$  by Gaussian isoperimetric inequality [Bobkov et al., 1997]. The same also holds with a Lipschitz transformation of Gaussian.

159 same regime where prior work HaoChen et al. [2021] guarantees the representations of clusters are  
160 linearly separable.

161 We also remark that all the assumptions are on the population positive-pair graph, which is sparse but  
162 has reasonable connected components (as partially evaluated in Wei et al. [2020]). The rest of the  
163 paper assumes access to population data, but the main results can be extended to polynomial sample  
164 results by leveraging a model class for representation functions with bounded Rademacher complexity  
165 as shown in HaoChen et al. [2021].<sup>3</sup>

### 166 3 Main Results on Linear Transferability

167 In this section, we analyze the *linear transferability* of contrastive representations by showing that  
168 representations encode information about the relative strength of relationships between clusters.

169 Let  $S$  and  $T$  be two disjoint subsets of  $\mathcal{X}$ , each formed by  $r$  clusters corresponding to  $r$  classes.  
170 We say a representation function has linear transferability from the *source domain*  $S$  to the *target*  
171 *domain*  $T$  if a linear head trained on labeled data from  $S$  can accurately predict the class labels on  $T$ .  
172 E.g., the representations in Fig. 1 (middle) has linear transferability because the max-margin linear  
173 classifier trained on  $S_{\text{dog}}$  vs.  $S_{\text{cat}}$  also works well on  $T_{\text{dog}}$  vs.  $T_{\text{cat}}$ . We note that linear separability  
174 is a different, weaker notion, which only requires the four groups of representations to be linearly  
175 separable from each other.

176 Mathematically, we assume that the source domain and target domain are formed by  $r$  clusters among  
177  $C_1, \dots, C_m$  for  $r \leq m/2$ . Without loss of generality, assume that the source domain consists of  
178 cluster  $S_1 = C_1, \dots, S_r = C_r$  and the target domain consists of  $T_1 = C_{r+1}, \dots, T_r = C_{2r}$ . Thus,  
179  $S = \cup_{i \in [r]} S_i$  and  $T = \cup_{i \in [r]} T_i$ . We assume that the correct label for data in  $S_i$  and  $T_i$  is the cluster  
180 identity  $i$ . Contrastive representations are trained on (samples of) the entire population data (which  
181 includes all  $C_i$ 's). The linear head is trained on the source with labels, and tested on the target.

182 Our key assumption is that the source and target classes are related correspondingly in the sense  
183 that there are more same-class cross-domain connections (between  $S_i$  and  $T_i$ ) than cross-class  
184 cross-domain connections (between  $S_i$  and  $T_j$  with  $i \neq j$ ), formalized below.

185 **Assumption 3.1** (Relative expansion). *Let  $\rho \triangleq \min_{i \in [r]} \phi(T_i, S_i)$  be the minimum min-expansions*  
186 *from  $T_i$  to  $S_i$ . For some sufficiently large universal constant  $c$  (e.g.,  $c = 8$  works), we assume that*  
187  *$\rho \geq c \cdot \alpha^2$  and that*

$$\rho = \min_{i \in [r]} \phi(T_i, S_i) \geq c \cdot \max_{i \neq j} \bar{\phi}(T_i, S_j) \quad (5)$$

188 Intuitively, equation (5) says that every vertex in  $T_i$  has more edges connected to  $S_i$  than to  $S_j$ .  
189 The condition  $\rho \gtrsim \alpha^2$  says that the min-expansion  $\rho$  is bigger than the square of max-expansion  
190  $\alpha$ . This is reasonable because  $\alpha \ll 1$  and thus  $\alpha^2 \ll \alpha$ , and we consider the min-expansion  $\rho$  and  
191 max-expansion  $\alpha$  to be somewhat comparable. In Section 3.1 we will relax this assumption and study  
192 the case when the average expansion  $\phi(T_i, S_i)$  is larger than  $\phi(T_i, S_j)$ .

193 Our assumption is weaker than that in the prior work [Cai et al., 2021] which also assumes expansion  
194 from  $S_i$  to  $T_i$  (though their goal is to study label propagation rather than contrastive learning). They  
195 assume the same-class cross-domain conductance  $\phi(T_i, S_i)$  to be larger than the *cross-class* same-  
196 domain conductance  $\phi(S_i, S_j)$ . Such an assumption limits the application to situations where the  
197 domains are far away from each other (such as DomainNet [Peng et al., 2019]).

198 Moreover, consider an interesting scenario with four clusters: photo dog, photo cat, sketch dog, and  
199 sketch cat. Shen et al. [2022] empirically showed that transferability can occur in the following two  
200 settings: (a) we view photo and sketch as domains: the source domain is photo dog vs photo cat, and  
201 the target domain is sketch dog vs sketch cat; (b) we view cat and dog as domains, whereas photo and  
202 sketch are classes: the source domain is photo dog vs sketch dog, and the target is photo cat vs sketch  
203 cat. The condition that cross-domain expansion is larger than cross-class expansion will fail to explain  
204 the transferability for one of these settings—if  $\phi(\text{photo dog, sketch dog}) < \phi(\text{photo dog, photo cat})$ ,  
205 then it cannot explain (a), whereas if  $\phi(\text{photo dog, sketch dog}) > \phi(\text{photo dog, photo cat})$ , it cannot  
206 explain (b). In contrast, our assumption only requires conditions such as  $\phi(\text{photo dog, sketch dog}) >$   
207  $\phi(\text{photo dog, sketch cat})$ , hence works for both settings.

<sup>3</sup>In contrast, the positive-graph built only on empirical examples will barely have any edges, and does not exhibit any nice properties. However, the sample complexity bound does not utilize the empirical graph at all.

208 We will propose a simple and novel linear head that enables linear transferability. Let  $\mathcal{P}_S$  be the  
 209 data distribution restricted to the source domain.<sup>4</sup> For  $i \in [r]$ , we construct the following average  
 210 representation for class  $i$  in the source:<sup>5</sup>

$$b_i = \mathbb{E}_{x \sim \mathcal{P}_S} [\mathbb{1}[x \in S_i] \cdot f(x)] \in \mathbb{R}^k. \quad (6)$$

211 One of the most natural linear head is to use the average feature  $b_i$ 's as the weight vector for class  $i$ ,  
 212 as in many practical few shot learning algorithms [Snell et al., 2017].<sup>6</sup> That is, we predict

$$g(x) = \arg \max_{i \in [r]} \langle f(x), b_i \rangle. \quad (7)$$

213 This classifier can transfer to the target under relatively strong assumptions (see the special cases in  
 214 the proof sketch in Section 4), but is vulnerable to complex asymmetric structures in the graph. To  
 215 strengthen the result, we consider a variant of this classifier with a proper preconditioning.

216 To do so, we first define the representation covariance matrix which will play an important role:  
 217  $\Sigma = \mathbb{E}_{x \sim P_{\mathcal{X}}} [f(x)f(x)^\top]$ . The computation of this matrix only uses unlabeled data. Since  $\Sigma \in \mathbb{R}^{k \times k}$   
 218 is a low-dimensional matrix for  $k$  not too large, we can accurately estimate it using finite samples  
 219 from  $P_{\mathcal{X}}$ . For the ease of theoretical analysis, we assume that we can compute this matrix exactly.  
 220 Now we define a family of linear heads on the target domain: for  $t \in \mathbb{Z}^+$ , define

$$g_t(x) = \arg \max_{i \in [r]} \langle f(x), \Sigma^{t-1} b_i \rangle. \quad (8)$$

221 The case when  $t = 1$  corresponds to the linear head in equation (7). When  $t$  is large,  $g_t$  will care more  
 222 about the correlation between  $f(x)$  and  $b_i$  in those directions where the representation variance is  
 223 large. Intuitively, directions with larger variance tend to contain information also in a more robust way,  
 224 hence the preconditioner has a “de-noising” effect. See Section 4 for more on why the preconditioning  
 225 improve the target error. Algorithm 1 gives the pseudocode for this linear classification algorithm.

---

**Algorithm 1** Preconditioned feature averaging (PFA)

---

**Require:** Pre-trained representation extractor  $f$ , unlabeled data  $P_{\mathcal{X}}$ , source domain labeled data  $\mathcal{P}_S$ ,  
 target domain test data  $\tilde{x}$ , integer  $t \in \mathbb{Z}^+$

- 1: Compute the preconditioner matrix  $\Sigma := \mathbb{E}_{x \sim P_{\mathcal{X}}} [f(x)f(x)^\top]$ .
  - 2: **for** every class  $i \in [r]$  **do**
  - 3:     Compute the mean feature of the class  $i$ :  $b_i := \mathbb{E}_{(x,y) \sim \mathcal{P}_S} [\mathbb{1}[y = i] \cdot f(x)]$ .
  - 4: **return** prediction  $\arg \max_{i \in [r]} \langle f(x), \Sigma^{t-1} b_i \rangle$ .
- 

226 We note that this linear head is different from prior work [Shen et al., 2022] where the linear head is  
 227 trained with logistic loss. We made this modification since this head is more amenable to theoretical  
 228 analysis. In Section 5 we show that this linear head also achieves superior empirical performance.

229 The error of a head  $g$  on the target domain is defined as:  $\mathcal{E}_T(g) = \mathbb{E}_{x \sim \mathcal{P}_T} [\mathbb{1}[x \notin T_{g(x)}]]$ . The  
 230 following theorem (proved in Appendix E) shows that the linear head  $g_t$  achieves high accuracy on  
 231 the target domain with a properly chosen  $t$ :

232 **Theorem 3.2.** *Suppose that Assumption 2.2 and 3.1 holds,  $P_{\mathcal{X}}(S)/P_{\mathcal{X}}(T) \leq O(1)$ . Let  $f$  be a*  
 233 *minimizer of the contrastive loss  $\mathcal{L}_2(\cdot)$  and the head  $g_t$  be defined in (8). Then, for any  $1 \leq t \leq$*   
 234  *$\rho/(8\alpha^2)$ , we have  $\mathcal{E}_T(g_t) \lesssim \frac{r}{\alpha^2 \lambda_{k+1}^2} \cdot \exp(-\frac{1}{2}t\lambda_{k+1})$ , where  $\lambda_{k+1}$  is the  $k+1$ -th smallest eigenvalue*  
 235 *of the Laplacian of the positive-pair graph. Furthermore, suppose Assumption 2.3 also holds and*  
 236  *$k \geq 2m$ , with  $t = \rho/(8\alpha^2)$ , we have*

$$\mathcal{E}_T(g_t) \lesssim \frac{r}{\alpha^2 \gamma^4} \cdot \exp\left(-\Omega\left(\frac{\rho \gamma^2}{\alpha^2}\right)\right). \quad (9)$$

---

<sup>4</sup>Formally, we have  $\mathcal{P}_S(x) := \frac{w(x)}{w(S)} \cdot \mathbb{1}[x \in S]$ , and  $\mathcal{P}_T(x)$  is defined similarly.

<sup>5</sup>We assume access to independent samples from  $\mathcal{P}_S$  and thus  $b_i$  can be accurately estimated with finite labeled samples in the source domain.

<sup>6</sup>We note that few-shot learning algorithms do not necessarily consider domain shift settings.

237 To see that RHS of equation (9) implies small error, one can consider a reasonable setting where  
 238 the intra-cluster conductance is on the order of constants (i.e.,  $\gamma \geq \Omega(1)$ ). In this case, so long as  
 239  $\rho \gg \alpha^2 \log(r/\alpha)$ , we would have error bound  $\mathcal{E}_T(g_t) \ll 1$ . In general, as long as  $\gamma \gg \alpha^{1/2}$  (the  
 240 intra-cluster conductance is much larger than cross-cluster connections or its square root) and  $\rho$  is  
 241 comparable to  $\alpha$ , we have  $\rho\gamma^2 \gg \alpha^2$  and thus a small upper bound of the error.

242 Theorem 3.2 shows that the error decreases as  $t$  increases. Intuitively, the PFA algorithm can be  
 243 thought of as computing a low-rank approximation of a “smoothed” graph with normalized adjacency  
 244 matrix  $\bar{A}^t$ , where  $\bar{A}$  is the normalized adjacency matrix of the original positive-pair graph. A larger  $t$   
 245 will make the low-rank approximation of  $\bar{A}^t$  more accurate, hence a smaller error. However, there’s  
 246 also an upper bound  $t \leq \rho/(8\alpha^2)$ , since when  $t$  is larger than this limit, the graph would be smoothed  
 247 too much, hence the corresponding relationship in the graph between source and target classes would  
 248 be erased. A more formal argument can be found in Section 4.

249 We also note that our theorem allows “overparameterization” in the sense that a larger representation  
 250 dimension  $k$  always leads to a smaller error bound (since  $\lambda_{k+1}$  is non-decreasing in  $k$ ). Moreover,  
 251 our theorem can be easily generalized to the setting where only polynomial samples of data are used  
 252 to train the representations and the linear head, assuming the realizability of the function class.

### 253 3.1 Linear transferability with average relative expansion

254 In this section, we relax Assumption 3.1 and only assume that the *total connections* from  $T_i$  to  $S_i$  is  
 255 larger than that from  $T_i$  to  $S_j$ , formalized below.

256 **Assumption 3.3** (Average relative expansion (weaker version of Assumption 3.1)). *For some*  
 257 *sufficiently large  $\tau > 0$ , we assume that*

$$\forall i, \phi(T_i, S_i) \geq \tau \cdot \alpha^2 \quad \text{and} \quad \forall i \neq j, \phi(T_i, S_i) \geq \tau \cdot \phi(T_i, S_j) \quad (10)$$

258 The following theorem (proved in Appendix F) generalizes Theorem 3.2 in this setting.

259 **Theorem 3.4.** *Suppose Assumptions 2.2, 2.3 and 3.3 hold,  $P_{\mathcal{X}}(S)/P_{\mathcal{X}}(T) \leq O(1)$ , and feature*  
 260 *dimension  $k \geq 2m$ . Then, for some  $t = \Omega\left(\frac{1}{\gamma^2} \cdot \log\left(\frac{1}{\alpha}\right)\right)$ , we have*

$$\mathcal{E}_T(g_t) \lesssim \frac{r}{\tau\gamma^8} \cdot \log^2\left(\frac{1}{\alpha}\right). \quad (11)$$

261 Again, consider a reasonable setting where the intra-cluster conductance is on the order of constants  
 262 (i.e.,  $\gamma \geq \Omega(1)$ ). In this case, so long as  $\tau$ , the gap between same-class cross-domain connection and  
 263 cross-class cross-domain connection is sufficiently large (e.g.,  $\tau \gg r \log^2(1/\alpha)$ ), we would have an  
 264 error bound  $\mathcal{E}_T(g_t) \ll 1$ .

265 We note that the intra-cluster connections (Assumption 2.3) are necessary, when we only use the  
 266 average relative expansion (Assumption 3.3 as opposed to Assumption 3.1). Otherwise, there may  
 267 exist subset  $\tilde{T}_i \subset T_i$  that is completely disconnected from  $\mathcal{X} \setminus \tilde{T}_i$ , hence no linear head trained on the  
 268 source can be accurate on  $\tilde{T}_i$ .

## 269 4 Proof Sketch

270 **Key challenge:** The analysis will involve careful understanding of how the spectrum of the normalized  
 271 adjacency matrix of the positive-pair graph is influenced by three types of connections: (i) intra-cluster  
 272 connections; (ii) connections between same-class cross-domain clusters (between  $S_i$  and  $T_i$ ), and  
 273 (iii) connections between cross-class and cross-domain clusters (between  $S_i$  and  $T_j$  for  $i \neq j$ ). Type  
 274 (i) connections have the dominating contribution to the spectrum of the graph, contributing to the top  
 275 eigenvalues. When analyzing the linear separability of the representations of the clusters, HaoChen  
 276 et al. [2021] essentially show that type (ii) and (iii) are negligible compared to type (i) connections.  
 277 However, this paper focuses on the linear transferability, where we need to compare how type (ii) and  
 278 type (iii) connections influence the spectrum of the normalized adjacency matrix. However, such a  
 279 comparison is challenging because they are both low-order terms compared to type (i) connections.  
 280 Essentially, we develop a technique that can take out the influence of the type (i) connections so that  
 281 they don’t negatively influence our comparisons between type (ii) and type (iii) connections.

282 Below we give a proof sketch of a slightly weaker version of Theorem 3.2 under a simplified setting.  
 283 First, we assume  $r = 2$ , that is, there are two source classes  $S_1$  and  $S_2$ , and two target classes  $T_1$  and

284  $T_2$ . Second, we assume the marginal distribution over  $x$  is uniform, that is,  $w(x) = 1/N$  as this case  
 285 typically capture the gist of the problem in spectral graph theory. Third, we will consider the simpler  
 286 case where the normalized adjacency matrix  $\bar{A}$  is PSD, and the regularization strength  $\sigma = 1$ .

287 Let  $\tilde{f}(x) = \sqrt{w(x)} \cdot f(x)$  and  $\tilde{F} \in \mathbb{R}^{N \times k}$  be the matrix with  $\tilde{f}(x)$  on its  $x$ -th row. HaoChen et al.  
 288 [2021] (or Proposition C.1) showed that matrix  $\tilde{F}\tilde{F}^\top$  contains the top- $k$  eigenvectors of  $\bar{A}$ . We will  
 289 first give a proof for the case where  $\tilde{F}\tilde{F}^\top$  exactly (Section 4.1) or near exactly (Section 4.2) recovers  
 290  $\bar{A}$ . Then we'll give a proof for the more realistic case where  $\tilde{F}\tilde{F}^\top$  is not guaranteed to approximate  
 291  $\bar{A}$  accurately (Section 4.3).

#### 292 4.1 Warmup case: when $k = \infty$ and $\tilde{F}\tilde{F}^\top = \bar{A}$

293 In this extremely simplified setting, the inner product between the embeddings perfectly represents  
 294 the graph (that is,  $\langle \tilde{f}(x), \tilde{f}(x') \rangle = \bar{A}_{x,x'}$ ). As a result, the connections between subsets of vertices, a  
 295 graph quantity, can be written as a linear algebraic quantity involving  $\tilde{F}$ :

$$w(A, B) = \frac{1}{N} \cdot \mathbf{1}_A^\top \bar{A} \mathbf{1}_B = \frac{1}{N} \cdot \mathbf{1}_A^\top \tilde{F} \tilde{F}^\top \mathbf{1}_B \quad (12)$$

296 where  $\mathbf{1}_A \in \{0, 1\}^N$  is the indicator vector for the set  $A$ ,<sup>7</sup> and we used the assumption  $w(x) = 1/N$ .  
 297 We start by considering the simple linear classifier which computes the difference between the means  
 298 of the representations in two clusters.

$$v = \mathbb{E}_{x \sim S_1} [f(x)] - \mathbb{E}_{x \sim S_2} [f(x)] = \tilde{F}^\top (\mathbf{1}_{S_1} - \mathbf{1}_{S_2}) \in \mathbb{R}^k \quad (13)$$

299 This classifier corresponds to the head  $g_1$  defined in Section 3,<sup>8</sup> which suffices for the special case  
 300 when  $\tilde{F}\tilde{F}^\top = \bar{A}$ . Applying  $v$  to any data point  $x \in T_1 \cup T_2$  results in the output  $\hat{y}(x) = f(x)^\top v$ . For  
 301 notational simplicity, we consider  $\hat{y}(x) = \tilde{f}(x)^\top v = \sqrt{w(x)} f(x)^\top \tilde{F}^\top (\mathbf{1}_{S_1} - \mathbf{1}_{S_2})$ . Because  $\hat{y}(x)$   
 302 and  $\hat{y}(x)$  has the same sign, it suffice to show that  $\hat{y}(x) > 0$  for  $x \in T_1$  and  $\hat{y}(x) < 0$  for  $x \in T_2$ .  
 303 Using equation (12) that links the linear algebraic quantity to the graph quantity,

$$\hat{y}(x) = \mathbf{1}_x^\top \tilde{F} \tilde{F}^\top (\mathbf{1}_{S_1} - \mathbf{1}_{S_2}) = \mathbf{1}_x^\top \bar{A} (\mathbf{1}_{S_1} - \mathbf{1}_{S_2}) = N \cdot (w(x, S_1) - w(x, S_2)) \quad (14)$$

304 In other words, the output  $\hat{y}$  depends on the relative expansions from  $x$  to  $S_1$  and from  $x$  to  $S_2$ . By  
 305 Assumption 3.1 or Assumption 3.3, we have that when  $x \in T_1$ ,  $x$  has more expansion to  $S_1$  than  $S_2$ ,  
 306 and vice versa for  $x \in T_2$ . Formally, by Assumption 3.1, we have that

$$\forall x \in T_1, \phi(x, S_1) \geq \rho \succ \phi(x, S_2) \text{ and } \forall x \in T_2, \phi(x, S_2) \geq \rho \succ \phi(x, S_1) \quad (15)$$

307 Because  $\phi(x, S_i) = w(x, S_i)/w(x) = N \cdot w(x, S_i)$ , we have for  $x \in T_1$ ,  $w(x, S_1) > w(x, S_2)$ , and  
 308 therefore by equation (14),  $\hat{y}(x) > 0$ . Similary when  $x \in T_2$ ,  $\hat{y}(x) < 0$ .

#### 309 4.2 When $k \ll N$ and $\bar{A}$ is almost rank- $k$

310 Assuming  $k = \infty$  is unrealistic since in most cases the feature is low-dimensional, i.e.,  $k \ll N$ .  
 311 However, so long as  $\bar{A}$  is almost rank- $k$ , the above argument still works with minor modification.  
 312 More concretely, suppose  $\bar{A}$ 's  $(k+1)$ -th largest eigenvalue,  $1 - \lambda_{k+1}$ , is less than  $\epsilon$ . Then we have  
 313  $\|\bar{A} - \tilde{F}\tilde{F}^\top\|_{\text{op}} = 1 - \lambda_{k+1} \leq \epsilon$ . It turns out that when  $\epsilon \ll 1$ , we can straightforwardly adapt the  
 314 proofs for the warm-up case with an additional  $\epsilon$  error in the final target performance. The error  
 315 comes from second step of equation (14).

#### 316 4.3 When $\bar{A}$ is far from low-rank

317 Unfortunately, a realistic graph's  $\lambda_{k+1}$  is typically not close to 1 when  $k \ll N$  (unless there's  
 318 very strong symmetry in the graph as those cases in Shen et al. [2022]). We aim to solve the more  
 319 realistic and interesting case where  $\lambda_{k+1}$  is a relatively small constant, e.g.,  $1/3$  or inverse polynomial  
 320 in  $d$ . The previous argument stops working because  $\tilde{F}\tilde{F}^\top$  is a *very noisy* approximation of  $\bar{A}$ :

<sup>7</sup>Formally, we have  $(\mathbf{1}_A)_x = 1$  iff  $x \in A$ .

<sup>8</sup>Here because of the binary setting, the classifier can only involve one weight vector  $v$  in  $\mathbb{R}^d$ ; this is equivalent to using two linear heads and then compute the maximum as in equation (7).



the error  $\|\bar{A} - \tilde{F}\tilde{F}^\top\|_{\text{op}} = 1 - \lambda_{k+1}$  is non-negligible and can be larger than  $\|\tilde{F}\tilde{F}^\top\|_{\text{op}} = \lambda_k$ . Our main approach is considering the power of  $\bar{A}$ , which reduces the negative impact of smaller eigenvalues. Concretely, though  $\|\bar{A} - \tilde{F}\tilde{F}^\top\|_{\text{op}} = 1 - \lambda_{k+1}$  is non-negligible,  $(\tilde{F}\tilde{F}^\top)^t$  is a much better approximation of  $\bar{A}^t$ :

$$\|\bar{A}^t - (\tilde{F}\tilde{F}^\top)^t\|_{\text{op}} = (1 - \lambda_{k+1})^t = \epsilon \quad (16)$$

when  $t \geq \Omega(\log(1/\epsilon))$ . Inspired by this, we consider the transformed linear classifier  $v' = \Sigma^{t-1}\tilde{F}^\top(\mathbf{1}_{S_1} - \mathbf{1}_{S_2})$ , where  $\Sigma = \tilde{F}^\top\tilde{F}$  is the covariance matrix of the representations. Intuitively, multiplying  $\Sigma$  forces the linear head to pay more attention to those large-variance directions of the representations, which are potentially more robust. The classifier outputs the following on a target datapoint  $x$  (with a rescaling of  $\sqrt{w(x)}$  for convenience)

$$\begin{aligned} \hat{y}'(x) &= \sqrt{w(x)}f(x)^\top v = \mathbf{1}_x^\top \tilde{F} \Sigma^{t-1} \tilde{F}^\top (\mathbf{1}_{S_1} - \mathbf{1}_{S_2}) \\ &= \mathbf{1}_x^\top (\tilde{F}\tilde{F}^\top)^t (\mathbf{1}_{S_1} - \mathbf{1}_{S_2}) \approx \mathbf{1}_x^\top \bar{A}^t (\mathbf{1}_{S_1} - \mathbf{1}_{S_2}) \end{aligned} \quad (17)$$

where the last step uses equation (16). Thus, to understand the sign of  $\hat{y}'(x)$ , it suffices to compare  $\mathbf{1}_x^\top \bar{A}^t \mathbf{1}_{S_1}$  with  $\mathbf{1}_x^\top \bar{A}^t \mathbf{1}_{S_2}$ . In other words, it suffices to prove that for  $x \in T_1$ ,  $\mathbf{1}_x^\top \bar{A}^t \mathbf{1}_{S_1} > \mathbf{1}_x^\top \bar{A}^t \mathbf{1}_{S_2}$ .

We control the quantity  $\mathbf{1}_x^\top \bar{A}^t \mathbf{1}_{S_1}$  by leveraging the following connection between  $\bar{A}$  and a random walk on the graph. First, let  $D = \text{diag}(w)$  be the diagonal matrix with  $D_{xx} = w(x)$ ,  $A \in \mathbb{R}^{N \times N}$  be the adjacency matrix, i.e.,  $A_{xx'} = w(x, x')$ . Observe that  $AD^{-1}$  is a transition matrix that defines a random walk on the graph, and  $(AD^{-1})^t$  correspond to the transition matrix for  $t$  steps of the random walk, denoted by  $x_0, x_t, \dots, x_t$ . Because  $\bar{A}^t = (D^{-1/2}AD^{-1/2})^t = D^{1/2}(D^{-1}A)^t D^{-1/2}$  and  $D = 1/N \cdot I_{N \times N}$ , we can verify that  $\mathbf{1}_x^\top \bar{A}^t \mathbf{1}_{S_1} = \Pr[x_t \in S_1 \mid x_0 = x]$ . That is,  $\mathbf{1}_x^\top \bar{A}^t \mathbf{1}_{S_1}$  and  $\mathbf{1}_x^\top \bar{A}^t \mathbf{1}_{S_2}$  are the probabilities to arrive at  $S_1$  and  $S_2$ , respectively, from  $x_0 = x$ . Therefore, to prove that  $\mathbf{1}_x^\top \bar{A}^t \mathbf{1}_{S_1} - \mathbf{1}_x^\top \bar{A}^t \mathbf{1}_{S_2} > 0$  for most  $x \in T_1$ , it suffices to prove that a  $t$ -step random walk starting from  $T_1$  is more likely to arrive at  $S_1$  than  $S_2$ . Intuitively, because  $T_1$  has more connections to  $S_1$  than  $S_2$ , hence a random walk starting from  $T_1$  is more likely to arrive at  $S_1$  than at  $S_2$ . In Section E, we prove this by induction.

## 5 Simulations

We empirically show that our proposed Algorithm 1 achieves good performance on the unsupervised domain adaptation problem. We conduct experiments on BREEDS [Santurkar et al., 2020]—a dataset for evaluating unsupervised domain adaptation algorithms (where the source and target domains are constructed from ImageNet images). For pre-training, we run the spectral contrastive learning algorithm [HaoChen et al., 2021] on the joint set of source and target domain data. Unlike the previous convention of discarding the projection head, we use the output after projection MLP as representations, because we find that it significantly improves the performance (for models learned by spectral contrastive loss) and is more consistent with the theoretical formulation. Given the pre-trained representations, we run Algorithm 1 with different choices of  $t$ . For comparison, we use the linear probing baseline where we train a linear head with logistic regression on the source domain. The table below lists the test accuracy on the target domain for Living-17 and Entity-30—two datasets constructed by BREEDS. Additional details can be found in Section A.

|           | Linear probe | PFA (ours, $t = 1$ ) | PFA (ours, $t = 2$ ) |
|-----------|--------------|----------------------|----------------------|
| Living-17 | 54.7         | 67.4                 | 72.0                 |
| Entity-30 | 46.4         | 62.3                 | 65.1                 |

Our experiments show that Algorithm 1 achieves better domain adaptation performance than linear probing given the pre-trained representations. When  $t = 1$ , our algorithm is simply computing the mean features of each class in the source domain, and then using them as the weight of a linear classifier. Despite having a lower accuracy than linear probing on the source domain (see section A for the source domain accuracy), this simple algorithm achieves much higher accuracy on the target domain. When  $t = 2$ , our algorithm incorporates the additional preconditioner matrix into the linear classifier, which further improves the domain adaptation performance. We note that our results on Entity-30 is better than Shen et al. [2022] who compare with many state-of-the-art unsupervised domain adaptation methods, suggesting the superior performance of our algorithm.

## References

- Sanjeev Arora, Hrishikesh Khandeparkar, Mikhail Khodak, Orestis Plevrakis, and Nikunj Saunshi. A theoretical analysis of contrastive unsupervised representation learning. In *International Conference on Machine Learning*, 2019.
- Eyal Ben-David, Carmel Rabinovitz, and Roi Reichart. Perl: Pivot-based domain adaptation for pre-trained deep contextualized embedding models. *Transactions of the Association for Computational Linguistics*, 8:504–521, 2020.
- Shai Ben-David, John Blitzer, Koby Crammer, Alex Kulesza, Fernando Pereira, and Jennifer Wortman Vaughan. A theory of learning from different domains. *Machine learning*, 79(1-2):151–175, 2010.
- John Blitzer, Mark Dredze, and Fernando Pereira. Biographies, bollywood, boom-boxes and blenders: Domain adaptation for sentiment classification. In *Proceedings of the 45th annual meeting of the association of computational linguistics*, pages 440–447, 2007.
- Sergey G Bobkov et al. An isoperimetric inequality on the discrete cube, and an elementary proof of the isoperimetric inequality in gauss space. *The Annals of Probability*, 25(1):206–214, 1997.
- Tianle Cai, Ruiqi Gao, Jason Lee, and Qi Lei. A theory of label propagation for subpopulation shift. In *International Conference on Machine Learning*, pages 1170–1182. PMLR, 2021.
- Mathilde Caron, Ishan Misra, Julien Mairal, Priya Goyal, Piotr Bojanowski, and Armand Joulin. Unsupervised learning of visual features by contrasting cluster assignments. *arXiv preprint arXiv:2006.09882*, 33:9912–9924, 2020.
- Minmin Chen, Zhixiang Xu, Kilian Q Weinberger, and Fei Sha. Marginalized denoising autoencoders for domain adaptation. In *Proceedings of the 29th International Conference on Machine Learning*, pages 1627–1634, 2012.
- Ting Chen, Simon Kornblith, Mohammad Norouzi, and Geoffrey Hinton. A simple framework for contrastive learning of visual representations. In *International conference on machine learning*, volume 119 of *Proceedings of Machine Learning Research*, pages 1597–1607. PMLR, PMLR, 13–18 Jul 2020a.
- Ting Chen, Simon Kornblith, Kevin Swersky, Mohammad Norouzi, and Geoffrey Hinton. Big self-supervised models are strong semi-supervised learners. *arXiv preprint arXiv:2006.10029*, 2020b.
- Xinlei Chen and Kaiming He. Exploring simple siamese representation learning. *arXiv preprint arXiv:2011.10566*, pages 15750–15758, June 2020.
- Xinlei Chen, Haoqi Fan, Ross Girshick, and Kaiming He. Improved baselines with momentum contrastive learning. *arXiv preprint arXiv:2003.04297*, 2020c.
- Yining Chen, Colin Wei, Ananya Kumar, and Tengyu Ma. Self-training avoids using spurious features under domain shift. In *Advances in Neural Information Processing Systems (NeurIPS)*, 2020d.
- Fan RK Chung and Fan Chung Graham. *Spectral graph theory*. Number 92. American Mathematical Soc., 1997.
- Adam Coates, Andrew Ng, and Honglak Lee. An analysis of single-layer networks in unsupervised feature learning. In *Proceedings of the fourteenth international conference on artificial intelligence and statistics*, pages 215–223. JMLR Workshop and Conference Proceedings, 2011.
- Geoffrey French, Michal Mackiewicz, and Mark Fisher. Self-ensembling for visual domain adaptation. *arXiv preprint arXiv:1706.05208*, 2017.
- Yaroslav Ganin, Evgeniya Ustinova, Hana Ajakan, Pascal Germain, Hugo Larochelle, François Laviolette, Mario Marchand, and Victor Lempitsky. Domain-adversarial training of neural networks. *The journal of machine learning research*, 17(1):2096–2030, 2016.
- Tianyu Gao, Xingcheng Yao, and Danqi Chen. Simcse: Simple contrastive learning of sentence embeddings. *arXiv preprint arXiv:2104.08821*, 2021.

412 Arthur Gretton, Alex Smola, Jiayuan Huang, Marcel Schmittfull, Karsten Borgwardt, and Bernhard  
413 Schölkopf. Covariate shift by kernel mean matching. In *Dataset Shift in Machine Learning*, 2008.

414 Jeff Z. HaoChen, Colin Wei, Adrien Gaidon, and Tengyu Ma. Provable guarantees for self-supervised  
415 deep learning with spectral contrastive loss, 2021.

416 Kaiming He, Haoqi Fan, Yuxin Wu, Saining Xie, and Ross Girshick. Momentum contrast for  
417 unsupervised visual representation learning. In *Proceedings of the IEEE/CVF Conference on*  
418 *Computer Vision and Pattern Recognition*, pages 9729–9738, June 2020.

419 Dan Hendrycks, Xiaoyuan Liu, Eric Wallace, Adam Dziedziec, Rishabh Krishnan, and Dawn Song.  
420 Pretrained transformers improve out-of-distribution robustness. In *Proceedings of the 58th Annual*  
421 *Meeting of the Association for Computational Linguistics*, pages 2744–2751, 2020.

422 Jiayuan Huang, Arthur Gretton, Karsten M Borgwardt, Bernhard Schölkopf, and Alex J Smola.  
423 Correcting sample selection bias by unlabeled data. In *Advances in neural information processing*  
424 *systems*, pages 601–608, 2006.

425 Neal Jean, Marshall Burke, Michael Xie, W. Matthew Davis, David B. Lobell, and Stefano Ermon.  
426 Combining satellite imagery and machine learning to predict poverty. *Science*, 353, 2016.

427 Donghyun Kim, Kaihong Wang, Stan Sclaroff, and Kate Saenko. A broad study of pre-training for  
428 domain generalization and adaptation. *arXiv preprint arXiv:2203.11819*, 2022.

429 Alex Krizhevsky, Geoffrey Hinton, et al. Learning multiple layers of features from tiny images. 2009.

430 Ananya Kumar, Tengyu Ma, and Percy Liang. Understanding self-training for gradual domain  
431 adaptation. In *International Conference on Machine Learning (ICML)*, 2020.

432 Ananya Kumar, Aditi Raghunathan, Robbie Jones, Tengyu Ma, and Percy Liang. Fine-tuning can  
433 distort pretrained features and underperform out-of-distribution. *arXiv preprint arXiv:2202.10054*,  
434 2022.

435 James R Lee, Shayan Oveis Gharan, and Luca Trevisan. Multiway spectral partitioning and higher-  
436 order cheeger inequalities. *Journal of the ACM (JACM)*, 61(6):1–30, 2014.

437 Jason D Lee, Qi Lei, Nikunj Saunshi, and Jiacheng Zhuo. Predicting what you already know helps:  
438 Provable self-supervised learning. *arXiv preprint arXiv:2008.01064*, 2020.

439 Anand Louis and Konstantin Makarychev. Approximation algorithm for sparsest k-partitioning.  
440 In *Proceedings of the twenty-fifth annual ACM-SIAM symposium on Discrete algorithms*, pages  
441 1244–1255. SIAM, 2014.

442 Yishay Mansour, Mehryar Mohri, and Afshin Rostamizadeh. Domain adaptation: Learning bounds  
443 and algorithms. *arXiv preprint arXiv:0902.3430*, 2009.

444 Changhwa Park, Jonghyun Lee, Jaeyoon Yoo, Minhoe Hur, and Sungroh Yoon. Joint contrastive  
445 learning for unsupervised domain adaptation. *arXiv preprint arXiv:2006.10297*, 2020.

446 Xingchao Peng, Qinxun Bai, Xide Xia, Zijun Huang, Kate Saenko, and Bo Wang. Moment matching  
447 for multi-source domain adaptation. In *Proceedings of the IEEE International Conference on*  
448 *Computer Vision*, pages 1406–1415, 2019.

449 Viraj Prabhu, Shivam Khare, Deeksha Kartik, and Judy Hoffman. Sentry: Selective entropy  
450 optimization via committee consistency for unsupervised domain adaptation. In *Proceedings*  
451 *of the IEEE/CVF International Conference on Computer Vision*, pages 8558–8567, 2021.

452 Shiori Sagawa, Pang Wei Koh, Tony Lee, Irena Gao, Kendrick Shen Sang Michael Xie, Ananya  
453 Kumar, Weihua Hu, Michihiro Yasunaga, Sara Beery Henrik Marklund, Etienne David, Ian  
454 Stavness, Wei Guo, Jure Leskovec, Tatsunori Hashimoto Kate Saenko, Sergey Levine, Chelsea Finn,  
455 and Percy Liang. Extending the wilds benchmark for unsupervised adaptation. In *International*  
456 *Conference on Learning Representations*, 2022.

457 Shibani Santurkar, Dimitris Tsipras, and Aleksander Madry. Breeds: Benchmarks for subpopulation  
458 shift. *arXiv*, 2020.

459 Kendrick Shen, Robbie Jones, Ananya Kumar, Sang Michael Xie, Jeff Z. HaoChen, Tengyu Ma,  
460 and Percy Liang. Connect, not collapse: Explaining contrastive learning for unsupervised domain  
461 adaptation. In *International Conference on Machine Learning (ICML)*, 2022.

462 Hidetoshi Shimodaira. Improving predictive inference under covariate shift by weighting the log-  
463 likelihood function. *Journal of statistical planning and inference*, 90(2):227–244, 2000.

464 Jake Snell, Kevin Swersky, and Richard Zemel. Prototypical networks for few-shot learning. *Advances*  
465 *in neural information processing systems*, 30, 2017.

466 Yixuan Su, Fangyu Liu, Zaiqiao Meng, Tian Lan, Lei Shu, Ehsan Shareghi, and Nigel Collier. Tactl:  
467 Improving bert pre-training with token-aware contrastive learning, 2021.

468 Masashi Sugiyama, Matthias Krauledat, and Klaus-Robert MÅžller. Covariate shift adaptation by  
469 importance weighted cross validation. *Journal of Machine Learning Research*, 8(May):985–1005,  
470 2007.

471 Mamatha Thota and Georgios Leontidis. Contrastive domain adaptation. In *Proceedings of the*  
472 *IEEE/CVF Conference on Computer Vision and Pattern Recognition*, pages 2209–2218, 2021.

473 Christopher Tosh, Akshay Krishnamurthy, and Daniel Hsu. Contrastive estimation reveals topic  
474 posterior information to linear models. *arXiv:2003.02234*, 2020.

475 Christopher Tosh, Akshay Krishnamurthy, and Daniel Hsu. Contrastive learning, multi-view  
476 redundancy, and linear models. In *Algorithmic Learning Theory*, pages 1179–1206. PMLR,  
477 2021.

478 Rui Wang, Zuxuan Wu, Zejia Weng, Jingjing Chen, Guo-Jun Qi, and Yu-Gang Jiang. Cross-domain  
479 contrastive learning for unsupervised domain adaptation. *arXiv preprint arXiv:2106.05528*, 2021.

480 Colin Wei, Kendrick Shen, Yining Chen, and Tengyu Ma. Theoretical analysis of self-training  
481 with deep networks on unlabeled data, 2020. URL <https://openreview.net/forum?id=rC8sJ4i6kaH>.

483 Mitchell Wortsman, Gabriel Ilharco, Mike Li, Jong Wook Kim, Hannaneh Hajishirzi, Ali Farhadi,  
484 Hongseok Namkoong, and Ludwig Schmidt. Robust fine-tuning of zero-shot models. *arXiv*  
485 *preprint arXiv:2109.01903*, 2021.

486 Mitchell Wortsman, Gabriel Ilharco, Samir Yitzhak Gadre, Rebecca Roelofs, Raphael Gontijo-Lopes,  
487 Ari S Morcos, Hongseok Namkoong, Ali Farhadi, Yair Carmon, Simon Kornblith, et al. Model  
488 soups: averaging weights of multiple fine-tuned models improves accuracy without increasing  
489 inference time. *arXiv preprint arXiv:2203.05482*, 2022.

490 Sang Michael Xie, Ananya Kumar, Robbie Jones, Fereshte Khani, Tengyu Ma, and Percy Liang. In-  
491 n-out: Pre-training and self-training using auxiliary information for out-of-distribution robustness.  
492 In *International Conference on Learning Representations*, 2020.

493 Jure Zbontar, Li Jing, Ishan Misra, Yann LeCun, and Stéphane Deny. Barlow twins: Self-supervised  
494 learning via redundancy reduction. *arXiv preprint arXiv:2103.03230*, 2021.

495 Yuchen Zhang, Tianle Liu, Mingsheng Long, and Michael Jordan. Bridging theory and algorithm for  
496 domain adaptation. In *International Conference on Machine Learning*, pages 7404–7413. PMLR,  
497 2019.

498 Han Zhao, Remi Tachet Des Combes, Kun Zhang, and Geoffrey Gordon. On learning invariant  
499 representations for domain adaptation. In *Proceedings of the 36th International Conference on*  
500 *Machine Learning*, pages 7523–7532. PMLR, 09–15 Jun 2019. URL <http://proceedings.mlr.press/v97/zhao19a.html>.

502 Yftah Ziser and Roi Reichart. Neural structural correspondence learning for domain adaptation. In  
503 *Proceedings of the 21st Conference on Computational Natural Language Learning (CoNLL 2017)*,  
504 pages 400–410, 2017.

505 Yftah Ziser and Roi Reichart. Deep pivot-based modeling for cross-language cross-domain transfer  
506 with minimal guidance. In *Proceedings of the 2018 Conference on Empirical Methods in Natural*  
507 *Language Processing*, pages 238–249, 2018.

## Checklist

The checklist follows the references. Please read the checklist guidelines carefully for information on how to answer these questions. For each question, change the default **[TODO]** to **[Yes]**, **[No]**, or **[N/A]**. You are strongly encouraged to include a **justification to your answer**, either by referencing the appropriate section of your paper or providing a brief inline description. For example:

- Did you include the license to the code and datasets? **[Yes]** See Section ??.
- Did you include the license to the code and datasets? **[No]** The code and the data are proprietary.
- Did you include the license to the code and datasets? **[N/A]**

Please do not modify the questions and only use the provided macros for your answers. Note that the Checklist section does not count towards the page limit. In your paper, please delete this instructions block and only keep the Checklist section heading above along with the questions/answers below.

### 1. For all authors...

- (a) Do the main claims made in the abstract and introduction accurately reflect the paper's contributions and scope? **[Yes]**
- (b) Did you describe the limitations of your work? **[Yes]**
- (c) Did you discuss any potential negative societal impacts of your work? **[N/A]**
- (d) Have you read the ethics review guidelines and ensured that your paper conforms to them? **[Yes]**

### 2. If you are including theoretical results...

- (a) Did you state the full set of assumptions of all theoretical results? **[Yes]**
- (b) Did you include complete proofs of all theoretical results? **[Yes]**

### 3. If you ran experiments...

- (a) Did you include the code, data, and instructions needed to reproduce the main experimental results (either in the supplemental material or as a URL)? **[No]**
- (b) Did you specify all the training details (e.g., data splits, hyperparameters, how they were chosen)? **[Yes]**
- (c) Did you report error bars (e.g., with respect to the random seed after running experiments multiple times)? **[No]**
- (d) Did you include the total amount of compute and the type of resources used (e.g., type of GPUs, internal cluster, or cloud provider)? **[No]**

### 4. If you are using existing assets (e.g., code, data, models) or curating/releasing new assets...

- (a) If your work uses existing assets, did you cite the creators? **[Yes]**
- (b) Did you mention the license of the assets? **[N/A]**
- (c) Did you include any new assets either in the supplemental material or as a URL? **[N/A]**
- (d) Did you discuss whether and how consent was obtained from people whose data you're using/curating? **[N/A]**
- (e) Did you discuss whether the data you are using/curating contains personally identifiable information or offensive content? **[N/A]**

### 5. If you used crowdsourcing or conducted research with human subjects...

- (a) Did you include the full text of instructions given to participants and screenshots, if applicable? **[N/A]**
- (b) Did you describe any potential participant risks, with links to Institutional Review Board (IRB) approvals, if applicable? **[N/A]**
- (c) Did you include the estimated hourly wage paid to participants and the total amount spent on participant compensation? **[N/A]**

## A Experiment details

Unlike the previous convention of discarding the projection head and using the pre-MLP layers as the features Chen et al. [2020a], we use the final output of the neural nets as representations, because we find that it significantly improves the performance (for models learned by spectral contrastive loss) and is more consistent with the theoretical formulation.

For the architecture, we use ResNet50 followed by a 3-layer MLP projection head, where the hidden and output dimensions are 1024. For pre-training, we use the spectral contrastive learning algorithm HaoChen et al. [2021] with hyperparameter  $\mu = 10$ , and use the same augmentation strategy as described in Chen and He [2020]. We train the neural network using SGD with momentum 0.9. The learning rate starts at 0.05 and decreases to 0 with a cosine schedule. We use weight decay 0.0001 and train for 800 epochs with batch size 256.

For linear probe experiments, we train a linear head using SGD with batch size 256 and weight decay 0 for 100 epochs, learning rate starts at 30.0 and is decayed by 10x at the 60th and 80th epochs. The classification accuracy on the source and target domains are listed in Table 1:

|           | linear probe | Ours (t=1)  | Ours (t=2)  |
|-----------|--------------|-------------|-------------|
| Living-17 | 91.3 / 54.7  | 92.6 / 67.4 | 90.5 / 72.0 |
| Entity-30 | 84.8 / 46.4  | 82.8 / 62.3 | 77.3 / 65.1 |

Table 1: Accuracy (%) of linear probing and Algorithm 1 on the source and target domain. The number before and after slash are on the source and target domains, respectively. The numbers after slash are the same as in Table 5.

### A.1 Additional datasets and comparison with algorithms

In addition to experiments in Table 5, we include additional experiments to show that PFA works competitively as a domain adaptation method. In particular, we add results on the STL→CIFAR10 dataset, and compare with more adaptation baseline methods (ERM, DANN and SENTRY). We also report linear probing results after discarding the mlp layer of a contrastive learned model. The results are listed below:

|             | ERM  | SENTRY | DANN | Linear Probe<br>(pre-mlp) | Linear Probe<br>(pre-mlp) | PFA<br>(post-mlp) |
|-------------|------|--------|------|---------------------------|---------------------------|-------------------|
| Living-17   | 63.3 | 75.5   | 71.3 | 79.1                      | 54.7                      | 72.0              |
| Entity-30   | 52.5 | 56.1   | 57.5 | 63.8                      | 46.4                      | 65.1              |
| STL→CIFAR10 | 57.4 | 53.8   | 55.2 | 79.8                      | 73.1                      | 80.0              |

Table 2: Accuracy (%) of PFA and baseline methods on the target domain. PFA consistently improves upon direct linear probing on the post-mlp contrastive representation. Furthermore, PFA is competitive and usually better than other baseline domain adaptation algorithms.

We provide details about the additional dataset and methods below:

**STL→CIFAR10:** In addition to datasets Living-17 and Entity-30, we add experiment results on STL→CIFAR10 Coates et al. [2011], Krizhevsky et al. [2009], French et al. [2017], which are two classical image recognition datasets often paired together as a domain adaptation benchmark. We resize the STL-10 images from  $96 \times 96$  to  $32 \times 32$  to match the resolution of CIFAR10, and remove the two non-overlapping classes (“monkey” in CIFAR-10 and “frog” in STL10), making the task a 9-class classification problem.

**ERM:** The standard ERM method trained on the labeled source data. The augmentation is set to be the same as in SimCLR (hence stronger than default supervised learning augmentation) due to its better performance on the target domain.

**SENTRY**[Prabhu et al., 2021]: A state-of-the-art unsupervised domain adaptation method that is capable of handling simultaneous data and label distribution shift.

587 **DANN**[Ganin et al., 2016]: A strong domain adaptation algorithm that tries to collapse the  
588 representations on the source and target domains. The augmentation is set to be the same as in  
589 SimCLR due to its better performance on the target domain.

590 The numbers of ERM, SENTRY and DANN are reported in Shen et al. [2022].

591 **Linear probe (pre-mlp)**: Linear probe performance on the representations before the mlp layers  
592 of a contrastive trained model. Our models are trained using spectral contrastive learning HaoChen  
593 et al. [2021] for 800 epochs with batch size 256. The learning rate starts from 0.05 and decays with a  
594 cosine schedule. For Living-17 and Entity-30, we use a ResNet-50 with a 3-layer mlp, and set both  
595 the hidden and the output dimension of the mlp to be 1024. For STL→CIFAR10, we use a ResNet-18  
596 with a 2-layer mlp, and set both the hidden and the output dimension of the mlp to be 1000.

597 **Linear probe (post-mlp)**: Linear probe performance on the representations after the mlp layer. The  
598 model is trained the same way as in “linear probe (pre-mlp)”. This is the linear probe accuracy  
599 reported in Table 5.

600 **PFA (post-mlp)**: Our proposed PFA method, where the feature is that after the mlp layer in a  
601 contrastive trained model. The model is trained the same way as in “linear probe (pre-mlp)”.

## 602 A.2 Sensitivity to the amount of labeled source data

603 We including additional experiments where we change the amount of labeled source data, where we  
604 set the labeled data to be 10%, 1% and 0.1% of the original living-17 / entity-30 dataset. Our results  
605 show that PFA consistently outperform linear probing (on post-mlp contrastive learned features):

|           | % of Labeled Data | Linear Probe | PFA  |
|-----------|-------------------|--------------|------|
| Living-17 | 100%              | 54.7         | 72.0 |
|           | 10%               | 53.7         | 66.6 |
|           | 1%                | 49.0         | 64.6 |
|           | 0.1%              | 25.5         | 43.3 |
| Entity-30 | 100%              | 46.4         | 65.1 |
|           | 10%               | 41.5         | 62.3 |
|           | 1%                | 46.1         | 62.1 |
|           | 0.1%              | 35.6         | 55.6 |

Table 3: Accuracy (%) of PFA and linear probing with different amount of labeled source data.

## 606 B The generalized spectral contrastive loss

607 Recall that the spectral contrastive loss HaoChen et al. [2021] is defined as

$$\mathcal{L}_{\text{scl}}(f) = -2 \cdot \mathbb{E}_{(x, x^+) \sim P_+} [f(x)^\top f(x^+)] + \mathbb{E}_{x, x' \sim P_{\mathcal{X}}} [(f(x)^\top f(x'))^2] \quad (18)$$

608 The following proposition shows that the generalized spectral contrastive loss  $\mathcal{L}_\sigma$  recovers the spectral  
609 contrastive loss when  $\sigma = 1$ .

610 **Proposition B.1.** *For all  $f : \mathcal{X} \rightarrow \mathbb{R}^k$ , we have*

$$\mathcal{L}_1(f) = \mathcal{L}_{\text{scl}}(f) + c, \quad (19)$$

611 *where  $c$  does not depend on  $f$ .*

612 *Proof of Proposition B.1.* Define matrix  $\tilde{F} \in \mathbb{R}^{N \times k}$  be such that the  $x$ -th row of it contains  $\sqrt{w(x)} \cdot$   
613  $f(x)$ . We have

$$\mathcal{L}_\sigma(f) = \mathbb{E}_{(x, x^+) \sim P_+} \left[ \|f(x) - f(x^+)\|_2^2 \right] + \sigma \cdot \left\| \mathbb{E}_{x \sim P_{\mathcal{X}}} [f(x)f(x)^\top] - I_k \right\|_F^2 \quad (20)$$

$$= \sum_{x, x' \in \mathcal{X}} w(x, x') \|f(x) - f(x')\|_2^2 + \sigma \cdot \left\| \tilde{F}^\top \tilde{F} - I_k \right\|_F^2 \quad (21)$$

$$= 2 \sum_{x \in \mathcal{X}} w(x) \|f(x)\|_2^2 - 2 \sum_{x, x' \in \mathcal{X}} w(x, x') f(x)^\top f(x') + \sigma \cdot \text{Tr} \left( \left( \tilde{F}^\top \tilde{F} - I_k \right)^2 \right) \quad (22)$$

$$= 2 \text{Tr} \left( \tilde{F} \tilde{F}^\top \right) - 2 \mathbb{E}_{(x, x^+) \sim P_+} [f(x)^\top f(x^+)] + \sigma \text{Tr} \left( \left( \tilde{F}^\top \tilde{F} \right)^2 \right) - 2\sigma \text{Tr} \left( \tilde{F}^\top \tilde{F} \right) + \text{const.} \quad (23)$$

614 When  $\sigma = 1$ , notice that  $\text{Tr} \left( \tilde{F} \tilde{F}^\top \right) = \text{Tr} \left( \tilde{F}^\top \tilde{F} \right)$  and  $\text{Tr} \left( \left( \tilde{F} \tilde{F}^\top \right)^2 \right) = \text{Tr} \left( \left( \tilde{F}^\top \tilde{F} \right)^2 \right)$ , we  
615 have

$$\mathcal{L}_1(f) = -2 \mathbb{E}_{(x, x^+) \sim P_+} [f(x)^\top f(x^+)] + \text{Tr} \left( \left( \tilde{F} \tilde{F}^\top \right)^2 \right) + \text{const} \quad (24)$$

$$= -2 \mathbb{E}_{(x, x^+) \sim P_+} [f(x)^\top f(x^+)] + \mathbb{E}_{x, x' \sim P_{\mathcal{X}}} \left[ \left( f(x)^\top f(x') \right)^2 \right] + \text{const.} \quad (25)$$

$$= \mathcal{L}_{\text{scl}}(f) + \text{const.} \quad (26)$$

616 □

## 617 C Relationship between contrastive representations and spectral 618 decomposition

619 HaoChen et al. [2021] showed that minimizing spectral contrastive loss is equivalent to spectral  
620 clustering on the positive-pair graph. We introduce basic concepts in spectral graph theory and extend  
621 this result slightly to the generalized spectral contrastive loss. We call  $\bar{A} \in \mathbb{R}^{N \times N}$  the *normalized*  
622 *adjacency matrix* of  $G(\mathcal{X}, w)$  if  $\bar{A}_{xx'} = w(x, x') / \sqrt{w(x)w(x')}$ .<sup>9</sup> Let  $\mathcal{L} := I_{N \times N} - \bar{A}$  be the  
623 *Laplacian* of  $G(\mathcal{X}, w)$ . It is well-known [Chung and Graham, 1997] that  $\mathcal{L}$  is a PSD matrix with  
624 all eigenvalues in  $[0, 2]$ . We use  $\lambda_i$  to denote the  $i$ -th smallest eigenvalue of  $\mathcal{L}$ . For a symmetric  
625 matrix  $M$ , we say  $M_{[k]}$  is the best rank- $k$  PSD approximation of  $M$  if it is a rank- $k$  PSD matrix that  
626 minimizes  $\|M_{[k]} - M\|_F^2$ .

627 Representations learned from  $\mathcal{L}_\sigma$  turn out to be closely related to the low-rank approximation of  $\bar{A}$ ,  
628 as shown in the following Proposition.

629 **Proposition C.1.** *Let  $f : \mathcal{X} \rightarrow \mathbb{R}^k$  be a minimizer of  $\mathcal{L}_1(\cdot)$ ,  $F \in \mathbb{R}^{N \times k}$  be the matrix where the  $x$ -th*  
630 *row contains  $f(x)$ , and  $D = \text{diag}(w)$  be the diagonal matrix with  $D_{xx} = w(x)$ . Then, we have*

$$D^{1/2} F F^\top D^{1/2} = \bar{A}_{[k]}. \quad (27)$$

631 *More generally, when  $f : \mathcal{X} \rightarrow \mathbb{R}^k$  is a minimizer of  $\mathcal{L}_\sigma(\cdot)$ ,  $D^{1/2} F F^\top D^{1/2}$  is the best rank- $k$  PSD*  
632 *approximation of  $\frac{1}{\sigma} \cdot \bar{A} + (1 - \frac{1}{\sigma}) \cdot I_{N \times N}$ .*

633 **Remark C.2.** *Proposition C.1 can be seen as a simple extension of Lemma 3.2 in HaoChen et al.*  
634 *[2021], which correspond to the case when  $\sigma = 1$ . The extension is helpful because we will work*  
635 *with  $\sigma > 1$ . E.g., we set  $\sigma = 2$  in Section 3, which makes  $\frac{1}{\sigma} \cdot \bar{A} + (1 - \frac{1}{\sigma}) \cdot I_{N \times N}$  a PSD matrix;*  
636 *hence its best rank- $k$  PSD approximation is the same as best rank- $k$  approximation.*

<sup>9</sup>We index  $\bar{A}$  by  $(x, x') \in \mathcal{X} \times \mathcal{X}$ . Generally, we will index the  $N$ -dimensional axis of an array by  $x \in \mathcal{X}$ .



637 *Proof of Proposition C.1.* Define  $\tilde{F} := D^{\frac{1}{2}}F$ . Following the Proof of Proposition B.1, we have

$$\mathcal{L}_\sigma(f) = 2 \operatorname{Tr} \left( \tilde{F} \tilde{F}^\top \right) - 2 \mathbb{E}_{(x, x^+) \sim P_+} [f(x)^\top f(x^+)] + \sigma \operatorname{Tr} \left( \left( \tilde{F}^\top \tilde{F} \right)^2 \right) - 2\sigma \operatorname{Tr} \left( \tilde{F}^\top \tilde{F} \right) + \text{const.} \quad (28)$$

638 Notice that  $\operatorname{Tr} \left( \tilde{F} \tilde{F}^\top \right) = \operatorname{Tr} \left( \tilde{F}^\top \tilde{F} \right)$  and  $\operatorname{Tr} \left( \left( \tilde{F} \tilde{F}^\top \right)^2 \right) = \operatorname{Tr} \left( \left( \tilde{F}^\top \tilde{F} \right)^2 \right)$ , we have

$$\mathcal{L}_\sigma(f) = \sigma \operatorname{Tr} \left( \left( \tilde{F} \tilde{F}^\top \right)^2 \right) - 2 \operatorname{Tr} \left( \left( \bar{A} + (\sigma - 1)I_{N \times N} \right) \tilde{F} \tilde{F}^\top \right) + \text{const} \quad (29)$$

$$= \sigma \left\| \tilde{F} \tilde{F}^\top - \left( \frac{1}{\sigma} \bar{A} + \left( 1 - \frac{1}{\sigma} \right) I_{N \times N} \right) \right\|_F^2 + \text{const.} \quad (30)$$

639 Therefore, directly applying Eckart-Young-Mirsky theorem finishes the proof.  $\square$

## 640 D Improved bound on linear separability

641 Let  $f : \mathcal{X} \rightarrow \mathbb{R}^k$  be a representation function with dimension  $k > m$ . For a matrix  $B \in \mathbb{R}^{k \times m}$ , we  
 642 define the linear head as  $g_B(x) = \arg \max_{i \in [m]} (B^\top f(x))_i$ . The *linear probing error* of  $f$  is the  
 643 minimal possible error of using such a linear head to predict which cluster a datapoint belongs to:

$$\mathcal{E}(f) := \min_{B \in \mathbb{R}^{k \times m}} \mathbb{E}_{x \sim P_{\mathcal{X}}} [\mathbb{1} [x \notin C_{g_B(x)}]]. \quad (31)$$

644 We say the representation  $f$  has linear separability if the linear probing error is small.

645 HaoChen et al. [2021] prove the linear separability of spectral contrastive representations. In particular,  
 646 they prove that  $\mathcal{E}(f) \leq O(\alpha/\lambda_{k+1})$  where  $\lambda_{k+1}$  is the  $(k+1)$ -th smallest eigenvalue of the Laplacian.  
 647 When  $k$  is set to be large enough—larger than the total number of distinct semantic meanings in the  
 648 graph— $G$  cannot be partitioned into  $k$  disconnected clusters, hence  $\lambda_{k+1}$  is big (e.g., on the order of  
 649 constant) according to Cheeger’s inequality, and we have  $\mathcal{E}(f) \leq O(\alpha)$ .<sup>10</sup>

650 The lemma below shows that Assumption 2.2 enables a better bound on the linear probing errors.

651 **Lemma D.1.** *Suppose that Assumption 2.2 holds. Let  $f : \mathcal{X} \rightarrow \mathbb{R}^k$  be a minimizer of the generalized*  
 652 *spectral contrastive loss  $\mathcal{L}_\sigma(\cdot)$  for  $\sigma \geq \lambda_k$ . Then, the linear probing error satisfies*

$$\mathcal{E}(f) \lesssim m\alpha^2/\lambda_{k+1}^2. \quad (32)$$

653 where  $\lambda_{k+1}$  is the  $(k+1)$ -th smallest eigenvalue of the Laplacian matrix of  $G(\mathcal{X}, w)$ .

654 **Remark D.2.** *Since the separation assumption inherently implies small  $\lambda_m$  (according to Cheeger’s*  
 655 *inequality), one needs to choose the representation dimension  $k > m$  for the bound to be non-vacuous.*  
 656 *When  $m \leq O(1)$  and  $\lambda_{k+1} \geq \Omega(1)$ , Lemma D.1 implies that the linear probing error of  $f$  is at most*  
 657  *$O(\alpha^2)$ , which improves upon the previous  $O(\alpha)$  bound.*

658 We first introduce the following claim, which controls the Rayleigh quotient for Laplacian square  $\mathcal{L}^2$   
 659 and the indicator vector of one cluster.

660 **Claim D.3.** *Suppose that Assumption 2.2 holds. Let  $i \in [m]$  be the index of one cluster. Let  $g_i \in \mathbb{R}^N$*   
 661 *be a vector such that its  $x$ -th dimension is  $\sqrt{w(x)}$  when  $x \in C_i$ , 0 otherwise. Then, we have*

$$g_i^\top \mathcal{L}^2 g_i \leq 2\alpha^2 \|g_i\|_2^2. \quad (33)$$

<sup>10</sup>High-order Cheeger’s inequality establishes a precise connection between  $\lambda_k$  and the clusterability of the graph. Loosely speaking, when the graph cannot be partition into  $k/2$  pieces with expansion at most  $\gamma$ , then  $\lambda_k \gtrsim \gamma^2$  (see Lee et al. [2014], Louis and Makarychev [2014], c.f. Lemma B.4 of HaoChen et al. [2021].)

662 *Proof of Claim D.3.* We first bound every dimension of the vector  $\mathcal{L}g_i = (I - \bar{A})g_i$ . Let  $x \in C_i$ , we  
 663 have

$$(\bar{A}g_i)_x = \sum_{\tilde{x} \in C_i} \frac{w(x, \tilde{x})}{\sqrt{w(x)}\sqrt{\tilde{x}}} \sqrt{\tilde{x}} \quad (34)$$

$$= \left( \sum_{\tilde{x} \in C_i} w(x, \tilde{x}) \right) \cdot \frac{1}{\sqrt{w(x)}} \quad (35)$$

$$\begin{cases} \geq \frac{1}{\sqrt{w(x)(1-\alpha)}} \cdot \sum_{\tilde{x} \in \mathcal{X}} w(x, \tilde{x}) = (1-\alpha)\sqrt{w(x)}. \\ \leq \frac{1}{\sqrt{w(x)}} \cdot \sum_{\tilde{x} \in \mathcal{X}} w(x, \tilde{x}) = \sqrt{w(x)}. \end{cases} \quad (36)$$

664 Let  $x' \notin C_i$ , we have

$$(\bar{A}g_i)_{x'} = \sum_{\tilde{x} \in C_i} \frac{w(x', \tilde{x})}{\sqrt{w(x')}\sqrt{w(\tilde{x})}} \cdot \sqrt{w(\tilde{x})} \quad (37)$$

$$= \frac{1}{\sqrt{w(x')}} \cdot \sum_{\tilde{x} \in C_i} w(x', \tilde{x}) \quad (38)$$

$$\begin{cases} \leq \alpha\sqrt{w(x')} \\ \geq 0. \end{cases} \quad (39)$$

665 Therefore, we have  $((I - \bar{A})g_i)_x \in [0, \alpha\sqrt{w(x)}]$  for any  $x \in C_i$ , and  $((I - \bar{A})g_i)_{x'} \in [-\alpha\sqrt{w(x')}, 0]$   
 666 for any  $x' \notin C_i$ . Let  $g'_i \triangleq (I - \bar{A})g_i$  as a shorthand, we have

$$g_i^\top \bar{A}g'_i = \sum_{\tilde{x} \in C_i, x \in C_i} \frac{w(\tilde{x}, x)}{\sqrt{w(\tilde{x})}\sqrt{w(x)}} \cdot \sqrt{w(\tilde{x})} \cdot (g'_i)_x + \sum_{\tilde{x} \in C_i, x' \notin C_i} \frac{w(\tilde{x}, x')}{\sqrt{w(\tilde{x})}\sqrt{w(x')}} \cdot \sqrt{w(\tilde{x})} \cdot (g'_i)_{x'} \quad (40)$$

$$= \sum_{\tilde{x} \in C_i, x \in C_i} \frac{w(\tilde{x}, x)}{\sqrt{w(x)}} \cdot (g'_i)_x + \sum_{\tilde{x} \in C_i, x' \notin C_i} \frac{w(\tilde{x}, x')}{\sqrt{w(x')}} \cdot (g'_i)_{x'}. \quad (41)$$

667 Also notice that

$$g_i^\top I g'_i = \sum_{x \in C_i} \sqrt{w(x)} \cdot (g'_i)_x. \quad (42)$$

668 Therefore, we have

$$g_i^\top (I - \bar{A})g'_i = Q_1 + Q_2, \quad (43)$$

669 where

$$Q_1 \triangleq \sum_{x \in C_i} \sqrt{w(x)} \cdot (g'_i)_x - \sum_{\tilde{x} \in C_i, x \in C_i} \frac{w(\tilde{x}, x)}{\sqrt{w(x)}} \cdot (g'_i)_x \quad (44)$$

$$= \sum_{x \in C_i} \left( \frac{\sum_{\tilde{x} \notin C_i} w(\tilde{x}, x)}{\sqrt{w(x)}} (g'_i)_x \right) \in \left[ 0, \alpha^2 \sum_{x \in C_i} w(x) \right], \quad (45)$$

670 and

$$Q_2 \triangleq - \sum_{\tilde{x} \in C_i, x' \notin C_i} \frac{w(\tilde{x}, x')}{\sqrt{w(x')}} (g'_i)_{x'} \in \left[ 0, \alpha^2 \sum_{x \in C_i} w(x) \right]. \quad (46)$$

671 As a result, we have

$$g_i^\top \mathcal{L}^2 g_i = g_i^\top (I - \bar{A})g'_i \leq 2\alpha^2 \sum_{x \in C_i} w(x) = 2\alpha^2 \|g_i\|_2^2. \quad (47)$$

672

□

673 Now we use the above claim to prove Lemma D.1.

674 *Proof of Lemma D.1.* Define matrix  $\tilde{F} \in \mathbb{R}^{N \times k}$  be such that the  $x$ -th row of it contains  $\sqrt{w(x)} \cdot f(x)$ .  
 675 According to Proposition C.1, the column span of  $\tilde{F}$  is exactly the span of the  $k$  largest positive  
 676 eigenvectors of  $\frac{1}{\sigma} \cdot \bar{A} + (1 - \frac{1}{\sigma}) \cdot I_{N \times N}$ , hence is the span of the  $k$  smallest eigenvectors of  $\mathcal{L}$ . For  
 677 every  $i \in [m]$ , define vector  $g_i \in \mathbb{R}^N$  be a vector such that its  $x$ -th dimension is  $\sqrt{w(x)}$  when  
 678  $x \in C_i$ , 0 otherwise. Let vector  $B_i \in \mathbb{R}^k$  be such that  $\tilde{F}B_i$  is the projection of  $g_i$  onto the span of  
 679 the  $k$  smallest eigenvectors of  $\mathcal{L}$ . Let  $B \in \mathbb{R}^{k \times m}$  be the matrix where  $B_i$  is the  $i$ -th column.  
 680 For any  $i \in [m]$ , we have

$$\sum_{x \in \mathcal{X}} w(x) (B_i^\top f(x) - \mathbb{1}[\tau(x) = c])^2 = \|\tilde{F}B_i - g_i\|_2^2 \leq \frac{g_i^\top \mathcal{L}^2 g_i}{\lambda_{k+1}^2} \leq \frac{2\alpha^2}{\lambda_{k+1}^2}, \quad (48)$$

681 where the first inequality uses the fact that  $\tilde{F}B_i$  is the projection of  $g_i$  onto the top  $k$  eigenspan, and  
 682 the second inequality is by Claim D.3. Let  $\tau : \mathcal{X} \rightarrow [m]$  be the cluster index function such that  
 683  $x \in C_{\tau(x)}$  for  $x \in \mathcal{X}$ . Summing the above equation over  $i \in [m]$  gives

$$\mathbb{E}_{x \sim P_{\mathcal{X}}} [\|B^\top f(x) - e_{\tau(x)}\|_2^2] \leq \frac{2m\alpha^2}{\lambda_{k+1}^2}. \quad (49)$$

684 Finally, we finish the proof by noticing that  $g_{f,B}(x) \neq \tau(x)$  only if  $\|B^\top f(x) - e_{\tau(x)}\|_2^2 \geq \frac{1}{2}$ .  
 685 □

## 686 E Proof of Theorem 3.2

687 We prove the following theorem which directly implies Theorem 3.2.

688 **Theorem E.1.** Suppose that Assumption 2.2 and 3.1 holds, and  $P_{\mathcal{X}}(S)/P_{\mathcal{X}}(T) \leq O(1)$ . Let  
 689  $f$  be a minimizer of the contrastive loss  $\mathcal{L}_2(\cdot)$  and the head  $g_t$  be defined in (8). Then, for any  
 690  $1 \leq t \leq \rho/(8\alpha^2)$ , we have

$$\mathcal{E}_T(g_t) \lesssim \frac{r}{\alpha^2 \lambda_{k+1}^2} \cdot (1 - \lambda_{k+1}/2)^t, \quad (50)$$

691 where  $\lambda_{k+1}$  is the  $k+1$ -th smallest eigenvalue of the Laplacian of the positive-pair graph.

692 We first introduce the following lemma, which says that the indicator vector of a cluster wouldn't  
 693 change much after multiplying  $\bar{A}$  a few times.

694 **Lemma E.2.** Suppose Assumption 2.2 holds. For every  $i \in [m]$ , define  $g_i \in \mathbb{R}^N$  be such that the  
 695  $x$ -th dimension of it is

$$(g_i)_x = \begin{cases} \sqrt{w(x)} & \text{if } x \in C_i \\ 0 & \text{otherwise} \end{cases} \quad (51)$$

696 Then, for any two clusters  $i \neq j$  in  $[m]$ , the following holds for any integer  $t \in [0, \frac{1}{\alpha}]$ :

697 • For any  $x \in C_i$ , we have

$$\left( \left( \frac{1}{2}I + \frac{1}{2}\bar{A} \right)^t g_i \right)_x \in \left[ (1 - t\alpha)\sqrt{w(x)}, \sqrt{w(x)} \right]. \quad (52)$$

698 • For any  $x \notin C_i$ , we have

$$\left( \left( \frac{1}{2}I + \frac{1}{2}\bar{A} \right)^t g_i \right)_x \in \left[ 0, t\alpha\sqrt{w(x)} \right]. \quad (53)$$

699 *Proof of Lemma E.2.* We prove this lemma by induction. When  $t = 0$ , obviously equations (52) and  
700 (53) are all true. Assume they are true for  $t = l$ , we prove that they are still true at  $t = l + 1$  so long  
701 as  $l \leq \frac{1}{\alpha}$ . We define shorthands  $g'_i = (\frac{1}{2}I + \frac{1}{2}\bar{A})^l g_i$  and  $g'_j = (\frac{1}{2}I + \frac{1}{2}\bar{A})^l g_j$ .

702 For the induction of Equation (52), let  $x \in C_i$ . On one hand, we have

$$\sqrt{w(x)} (\bar{A}g'_i)_x = \sum_{\tilde{x} \in C_i} \frac{w(x, \tilde{x})}{\sqrt{w(\tilde{x})}} (g'_i)_{\tilde{x}} + \sum_{\tilde{x} \notin C_i} \frac{w(x, \tilde{x})}{\sqrt{w(\tilde{x})}} (g'_i)_{\tilde{x}} \quad (54)$$

$$\leq \sum_{\tilde{x} \in C_i} \frac{w(x, \tilde{x})}{\sqrt{w(\tilde{x})}} \sqrt{w(\tilde{x})} + \sum_{\tilde{x} \notin C_i} w(x, \tilde{x}) (l\alpha) \quad (55)$$

$$\leq \sum_{\tilde{x} \in \mathcal{X}} w(x, \tilde{x}) = w(x), \quad (56)$$

703 where the first inequality uses Equations (52) and (53) at  $t = l$ , and the second inequality uses  $l \leq \frac{1}{\alpha}$ .  
704 On the other hand, we have

$$\sqrt{w(x)} (\bar{A}g'_i)_x = \sum_{\tilde{x} \in C_i} \frac{w(x, \tilde{x})}{\sqrt{w(\tilde{x})}} (g'_i)_{\tilde{x}} + \sum_{\tilde{x} \notin C_i} \frac{w(x, \tilde{x})}{\sqrt{w(\tilde{x})}} (g'_i)_{\tilde{x}} \quad (57)$$

$$\geq \sum_{\tilde{x} \in C_i} \frac{w(x, \tilde{x})}{\sqrt{w(\tilde{x})}} (1 - l\alpha) \sqrt{w(\tilde{x})} \quad (58)$$

$$\geq (1 - l\alpha)(1 - \alpha)w(x) \geq (1 - (l + 1)\alpha)w(x), \quad (59)$$

705 where the first inequality uses Equations (52) and (53) at  $t = l$ , and the second inequality uses  
706 the definition of  $\alpha$ -max-connection. Combining them gives us  $\sqrt{w(x)} (\bar{A}g'_i)_x \in [(1 - (l + 1)\alpha)\sqrt{w(x)}, \sqrt{w(x)}]$ , which directly leads to

$$\left( \left( \frac{1}{2}I + \frac{1}{2}\bar{A} \right)^{l+1} g_i \right)_x = \frac{1}{2}(g'_i)_x + \frac{1}{2}(\bar{A}g'_i)_x \in \left[ (1 - (l + 1)\alpha)\sqrt{w(x)}, \sqrt{w(x)} \right]. \quad (60)$$

708 For the induction of Equation (53), let  $x \notin C_i$ . Since  $\bar{A}$  and  $g_i$  are both element-wise nonnegative,  
709 we have  $\bar{A}g'_i$  is element-wise nonnegative, hence  $(\bar{A}g'_i)_x \geq 0$ . On the other hand, we have

$$\sqrt{w(x)} (\bar{A}g'_i)_x = \sum_{\tilde{x} \in C_i} \frac{w(x, \tilde{x})}{\sqrt{w(\tilde{x})}} (g'_i)_{\tilde{x}} + \sum_{\tilde{x} \notin C_i} \frac{w(x, \tilde{x})}{\sqrt{w(\tilde{x})}} (g'_i)_{\tilde{x}} \quad (61)$$

$$\leq \sum_{\tilde{x} \in C_i} \frac{w(x, \tilde{x})}{\sqrt{w(\tilde{x})}} \sqrt{w(\tilde{x})} + l\alpha \cdot \sum_{\tilde{x} \notin C_i} \frac{w(x, \tilde{x})}{\sqrt{w(\tilde{x})}} \sqrt{w(\tilde{x})} \quad (62)$$

$$\leq \alpha w(x) + l\alpha w(x) = (l + 1)\alpha w(x), \quad (63)$$

710 where the first inequality uses Equations (52) and (53) at  $t = l$ , and the second inequality is by  
711  $\alpha$ -max-connection. Hence we have  $(\bar{A}g'_i)_x \in [0, (l + 1)\alpha w(x)]$  which directly leads to

$$\left( \left( \frac{1}{2}I + \frac{1}{2}\bar{A} \right)^{l+1} g_i \right)_x = \frac{1}{2}(g'_i)_x + \frac{1}{2}(\bar{A}g'_i)_x \in \left[ 0, (l + 1)\alpha \sqrt{w(x)} \right]. \quad (64)$$

712 □

713 The following lemma shows that a random walk starting from  $T_i$  is more likely to arrive at  $S_i$  than in  
714  $S_j$  for  $j \neq i$ .

715 **Lemma E.3.** Suppose that Assumptions 2.2 and 3.1 hold. For every  $i \in [r]$ , define  $g_i \in \mathbb{R}^N$  be such  
716 that the  $x$ -th dimension of it is

$$(g_i)_x = \begin{cases} \sqrt{w(x)} & \text{if } x \in S_i \\ 0 & \text{otherwise} \end{cases} \quad (65)$$

717 Then, for any two classes  $i \neq j$  in  $[r]$ , we have the following holds for any integer  $t \in [0, \frac{\rho}{8\alpha^2}]$  and  
 718  $x \in T_i$ :

$$\left( \left( \frac{1}{2}I + \frac{1}{2}\bar{A} \right)^t g_i \right)_x - \left( \left( \frac{1}{2}I + \frac{1}{2}\bar{A} \right)^t g_j \right)_x \geq \begin{cases} 0 & \text{if } t = 0 \\ \frac{1}{4}\rho\sqrt{w(x)} & \text{if } t \geq 1 \end{cases}. \quad (66)$$

719 *Proof of Lemma E.3.* We prove this lemma by induction. When  $t = 0$ , obviously equation (66) is  
 720 true. Assume it is true for  $t = l$ , we prove that they are still true at  $t = l + 1$  so long as  $l \leq \frac{\rho}{8\alpha^2}$ .

721 We define shorthands  $g'_i = (\frac{1}{2}I + \frac{1}{2}\bar{A})^l g_i$  and  $g'_j = (\frac{1}{2}I + \frac{1}{2}\bar{A})^l g_j$ .

722 Let  $x \in T_i$ , we notice that

$$\sqrt{w(x)} (\bar{A}g'_i - \bar{A}g'_j)_x = \underbrace{\sum_{\tilde{x} \in S_i} \frac{w(x, \tilde{x})}{\sqrt{x\tilde{x}}} ((g'_i)_{\tilde{x}} - (g'_j)_{\tilde{x}})}_{Q_1} + \underbrace{\sum_{\tilde{x} \in S_j} \frac{w(x, \tilde{x})}{\sqrt{x\tilde{x}}} ((g'_i)_{\tilde{x}} - (g'_j)_{\tilde{x}})}_{Q_2} \quad (67)$$

$$+ \underbrace{\sum_{\tilde{x} \in T_i} \frac{w(x, \tilde{x})}{\sqrt{x\tilde{x}}} ((g'_i)_{\tilde{x}} - (g'_j)_{\tilde{x}})}_{Q_3} + \underbrace{\sum_{\tilde{x} \notin S_i \cup S_j \cup T_i} \frac{w(x, \tilde{x})}{\sqrt{x\tilde{x}}} ((g'_i)_{\tilde{x}} - (g'_j)_{\tilde{x}})}_{Q_4} \quad (68)$$

723 Since  $\rho \leq \alpha$  must be true for the assumptions to be valid, we know  $l \leq \frac{\rho}{8\alpha^2} \leq \frac{1}{\alpha}$ , hence we apply  
 724 Lemma E.2 and have Equations (52) and (53) hold at  $t = l$ . Using them together with Equation (66)  
 725 at  $t = l$  and Assumption 3.1, we have

$$Q_1 \geq \sum_{\tilde{x} \in S_i} \frac{w(x, \tilde{x})}{\sqrt{w(\tilde{x})}} (1 - 2l\alpha) \sqrt{w(\tilde{x})} \geq (1 - 2l\alpha) \rho w(x), \quad (69)$$

726

$$Q_2 \geq - \sum_{\tilde{x} \in S_j} \frac{w(x, \tilde{x})}{\sqrt{w(\tilde{x})}} \sqrt{w(\tilde{x})} \geq -\frac{\rho}{c} w(x), \quad (70)$$

727

$$Q_3 \geq 0, \quad (71)$$

728 and

$$Q_4 \geq - \sum_{\tilde{x} \notin S_i \cup S_j \cup T_i} \frac{w(x, \tilde{x})}{\sqrt{w(\tilde{x})}} (l\alpha) \sqrt{w(x)} \geq -l\alpha^2 w(x). \quad (72)$$

729 Combining them gives us

$$\sqrt{w(x)} (\bar{A}g'_i - \bar{A}g'_j)_x \geq \left( \rho - \left( \frac{\rho}{c} + 2l\alpha\rho + l\alpha^2 \right) \right) w(x). \quad (73)$$

730 Since  $\frac{\rho}{c} \leq \frac{1}{8}\rho$ ,  $l \leq \frac{\rho}{8\alpha^2}$  and  $\rho \leq \alpha$ , we have  $\sqrt{w(x)} (\bar{A}g'_i - \bar{A}g'_j)_x \geq \frac{1}{2}\rho w(x)$  hence  $(\bar{A}g'_i -$   
 731  $\bar{A}g'_j)_x \geq \frac{1}{2}\rho\sqrt{w(x)}$ . As a result, we have

$$\left( \left( \frac{1}{2}I + \frac{1}{2}\bar{A} \right)^{l+1} g_i \right)_x - \left( \left( \frac{1}{2}I + \frac{1}{2}\bar{A} \right)^{l+1} g_j \right)_x \geq \frac{1}{4}\rho\sqrt{w(x)}. \quad (74)$$

732

□

733 The following lemma shows that the power of  $\bar{A}$  can be low-rank approximated with a small error.

734 **Lemma E.4.** Suppose that Assumption 2.2 holds. For every  $i \in [r]$ , define  $g_i \in \mathbb{R}^N$  be such that the  
 735  $x$ -th dimension of it is

$$(g_i)_x = \begin{cases} \sqrt{w(x)} & \text{if } x \in S_i \\ 0 & \text{otherwise} \end{cases} \quad (75)$$

736 Let  $f : \mathcal{X} \rightarrow \mathbb{R}^k$  be a minimizer of the generalized spectral contrastive loss  $\mathcal{L}_2(\cdot)$ . Define matrix  
 737  $\tilde{F} \in \mathbb{R}^{N \times k}$  be such that the  $x$ -th row of it contains  $\sqrt{w(x)} \cdot f(x)$ . Then, we have

$$\left\| \left( \frac{1}{2}I + \frac{1}{2}\bar{A} \right)^t g_i - \left( \tilde{F}\tilde{F}^\top \right)^t g_i \right\|_2^2 \leq \frac{2\epsilon_t \alpha^2}{\lambda_{k+1}^2} \|g_i\|_2^2, \quad (76)$$

738 where

$$\epsilon_t = \left(1 - \frac{1}{2}\lambda_{k+1}\right)^{2t}. \quad (77)$$

739 *Proof of Lemma E.4.* Let  $\Pi_k(g_i)$  be the projection of  $g_i$  onto the column span of  $\tilde{F}$ . Notice that  
 740 every eigenvalue of  $\mathcal{L}$  is in the range  $[0, 2]$ , by Theorem D.1 we have

$$\|g_i - \Pi_k(g_i)\|_2^2 \leq \frac{2\alpha^2}{\lambda_{k+1}^2}. \quad (78)$$

741 Therefore, notice that  $\tilde{F}\tilde{F}^\top$  is exactly the top  $k$  components of  $\frac{1}{2}I + \frac{1}{2}\bar{A}$ , we have

$$\left\| \left( \frac{1}{2}I + \frac{1}{2}\bar{A} \right)^t g_i - \left( \tilde{F}\tilde{F}^\top \right)^t g_i \right\|_2^2 \leq \left(1 - \frac{1}{2}\lambda_{k+1}\right)^{2t} \|g_i - \Pi_k(g_i)\|_2^2 \leq \frac{2\epsilon_t \alpha^2}{\lambda_{k+1}^2} \|g_i\|_2^2. \quad (79)$$

742 □

743 Using the above lemmas, we finish the proof of Theorem E.1.

744 *Proof of Theorem E.1.* For every  $i \in [r]$ , define  $g_i \in \mathbb{R}^N$  be such that the  $x$ -th dimension of it is

$$(g_i)_x = \begin{cases} \sqrt{w(x)} & \text{if } x \in S_i \\ 0 & \text{otherwise} \end{cases} \quad (80)$$

745 Define matrix  $\tilde{F} \in \mathbb{R}^{N \times k}$  be such that the  $x$ -th row of it contains  $\sqrt{w(x)} \cdot f(x)$ .

746 Let  $i \neq j$  be two different classes in  $[r]$ . By Lemma E.4 we know that

$$\left\| \left( \frac{1}{2}I + \frac{1}{2}\bar{A} \right)^t g_i - \left( \tilde{F}\tilde{F}^\top \right)^t g_i \right\|_2^2 \leq \frac{2\epsilon_t \alpha^2}{\lambda_{k+1}^2} \|g_i\|_2^2, \quad (81)$$

747 and

$$\left\| \left( \frac{1}{2}I + \frac{1}{2}\bar{A} \right)^t g_j - \left( \tilde{F}\tilde{F}^\top \right)^t g_j \right\|_2^2 \leq \frac{2\epsilon_t \alpha^2}{\lambda_{k+1}^2} \|g_j\|_2^2. \quad (82)$$

748 Define shorthand

$$Q_{i,j} = \left( \left( \tilde{F}\tilde{F}^\top \right)^t g_i - \left( \tilde{F}\tilde{F}^\top \right)^t g_j \right) - \left( \left( \frac{1}{2}I + \frac{1}{2}\bar{A} \right)^t g_i - \left( \frac{1}{2}I + \frac{1}{2}\bar{A} \right)^t g_j \right). \quad (83)$$

749 From Equations (81) and (82) we have

$$\|Q_{i,j}\|_2^2 \leq \frac{4\epsilon_t \alpha^2}{\lambda_{k+1}^2} (\|g_i\|_2^2 + \|g_j\|_2^2). \quad (84)$$

750 Recall that

$$\Sigma = \mathbb{E}_{x \sim P_{\mathcal{X}}} [f(x)f(x)^\top] = \tilde{F}^\top \tilde{F}, \quad (85)$$

751 and for  $i \in [r]$ ,

$$b_i = \mathbb{E}_{x \sim \mathcal{P}_S} [\mathbb{1}[x \in S_i] \cdot f(x)] = \frac{\tilde{F}^\top g_i}{\mathcal{P}_{\mathcal{X}}(S)}. \quad (86)$$

752 We can rewrite the prediction for any  $x \in T$ ,

$$g_t(x) = \arg \max_{i \in [r]} f(x)^\top \Sigma^{t-1} b_i = \arg \max_{i \in [r]} \left( (\tilde{F} \tilde{F}^\top)^t g_i \right)_x. \quad (87)$$

753 Therefore, for  $x \in T_i$ , in order for  $g_t(x) = j \neq i$ , there must be

$$\left( (\tilde{F} \tilde{F}^\top)^t g_i - (\tilde{F} \tilde{F}^\top)^t g_j \right)_x \leq 0. \quad (88)$$

754 On the other hand, we know from Lemma E.3 that

$$\left( \left( \frac{1}{2} I + \frac{1}{2} \bar{A} \right)^t g_i - \left( \frac{1}{2} I + \frac{1}{2} \bar{A} \right)^t g_j \right)_x \geq \frac{1}{4} \rho \sqrt{w(x)}. \quad (89)$$

755 Therefore, whenever  $x \in T_i$ , in order for  $g_t(x) = j$ , there has to be

$$(Q_{ij})_x \leq -\frac{1}{4} \rho \sqrt{w(x)}. \quad (90)$$

756 Finally, we can bound the target error as follows:

$$\mathbb{E}_{x \sim \mathcal{P}_T} [\mathbb{1}[g_t(x) \neq y(x)]] = \frac{1}{\mathcal{P}_{\mathcal{X}}(T)} \sum_{x \in T} \mathbb{1}[g_t(x) \neq y(x)] \cdot w(x) \quad (91)$$

$$= \frac{1}{\mathcal{P}_{\mathcal{X}}(T)} \sum_{i \in [r]} \sum_{j \neq i} \sum_{x \in T_i} \mathbb{1}[g_t(x) = j] \cdot w(x) \quad (92)$$

$$\leq \frac{1}{\mathcal{P}_{\mathcal{X}}(T)} \sum_{i \in [r]} \sum_{j \neq i} \sum_{x \in T_i} \frac{(Q_{ij})_x^2 w(x)}{\frac{1}{16} \rho^2 w(x)} \quad (93)$$

$$\leq \frac{1}{\mathcal{P}_{\mathcal{X}}(T)} \frac{32r}{\rho^2} \cdot \frac{4\epsilon_t \alpha^2}{\lambda_{k+1}^2} \sum_{i \in [r]} \|g_i\|_2^2 \quad (94)$$

$$= \frac{128\epsilon_t r \alpha^2}{\rho^2 \lambda_{k+1}^2} \cdot \frac{\mathcal{P}_{\mathcal{X}}(S)}{\mathcal{P}_{\mathcal{X}}(T)}, \quad (95)$$

757 where the first inequality is from Equation (90) and the second inequality follows Equation (84).  
758 Notice that Assumption 3.1 we have  $\alpha^2 \lesssim \rho$ , hence we finish the proof.

759 □

## 760 F Proof of Theorem 3.4

761 We prove the following theorem which directly implies Theorem 3.4.

762 **Theorem F.1.** Suppose Assumptions 2.2, 3.3 and 2.3 hold and  $P_{\mathcal{X}}(S)/P_{\mathcal{X}}(T) \leq O(1)$ . Let  $g_t$  be  
763 defined the same as in Theorem 3.2. Then, for any  $1 \leq t \leq \frac{1}{\alpha}$ , we have

$$\mathcal{E}_T(g_t) \lesssim \frac{r}{\lambda_{k+1}^2} \cdot \max \left\{ \frac{1}{\tau^2 \alpha^4} \left( 1 - \frac{1}{4} \min\{\gamma^2, \lambda_{k+1}\} \right)^t, \frac{t^2}{\tau} \right\}, \quad (96)$$

764 where  $\lambda_{k+1}$  is the  $k+1$ -th smallest eigenvalue of the Laplacian of the positive-pair graph.

765 For every  $i \in [r]$ , we consider a graph  $G(T_i, w)$  that is  $G(\mathcal{X}, w)$  restricted on  $T_i$ . We use  $\lambda_{T_i}$  to  
766 denote the second smallest eigenvalue of the Laplacian of  $G(T_i, w)$ . For  $x \in T_i$ , we use  $\hat{w}_x =$   
767  $\sum_{x' \in T_i} w(x, x')$  to denote the total weight of  $x$  in the restricted graph  $G(T_i, w)$ . We use  $A_{T_i}$  to  
768 denote the normalized adjacency matrix of  $G(T_i, w)$ .

769 The following lemma shows the relationship between intra-class expansion and the eigenvalue of  
770 the restricted graph's Laplacian.

771 **Lemma F.2.** Suppose that Assumption 2.3 holds. Then, we have

$$\lambda_{T_i} \geq \frac{\gamma^2}{2}. \quad (97)$$

772 *Proof.* For set  $H \subset T_i$ , we use  $\hat{w}(H) = \sum_{x \in H, x' \in T_i} w(x, x')$  to denote the size of set  $S$  in restricted  
773 graph  $G(T_i, w)$ . Clearly  $\hat{w}(H) \leq w(H)$ . We have

$$\min_{H \subseteq T_i} \frac{w(H, T_i \setminus H)}{\min\{\hat{w}(H), \hat{w}(T_i \setminus H)\}} \geq \min_{H \subseteq T_i} \frac{w(H, T_i \setminus H)}{\min\{w(H), w(T_i \setminus H)\}} \geq \gamma. \quad (98)$$

774 Directly applying Cheeger's Inequality finishes the proof.  $\square$

775 For every  $i \in [r]$ , define  $g_i \in \mathbb{R}^N$  be such that the  $x$ -th dimension of it is

$$(g_i)_x = \begin{cases} \sqrt{w(x)} & \text{if } x \in S_i \\ 0 & \text{otherwise} \end{cases} \quad (99)$$

776 The following lemma lower bounds the probability that a random walk starting from  $T_i$  arrives at  $S_i$ .

777 **Lemma F.3.** Suppose that Assumption 2.2 holds. For every  $i \in [r]$  and  $t \geq 0$ , there exists vectors  
778  $\Delta_i \in \mathbb{R}^{|T_i|}$  such that for any  $x \in T_i$ ,

$$\left( \left( \frac{1}{2}I + \frac{1}{2}\bar{A} \right)^t g_i \right)_x \geq \frac{1}{2}(1 - \alpha)^t \rho_i \sqrt{w(x)} + (\Delta_i)_x, \quad (100)$$

779 where  $\rho_i := \phi(T_i, S_i)$ , and

$$\|\Delta_i\|^2 \leq \left( 1 - \frac{\lambda_{T_i}}{2} \right)^{2(t-1)} \mathcal{P}_{\mathcal{X}}(T_i). \quad (101)$$

780 *Proof of Lemma F.3.* Recall that  $\bar{A}_{T_i}$  is the normalized adjacency matrix of the restricted graph on  
781  $T_i$ . We first notice that for any  $x, x' \in T_i$ ,

$$\left( \frac{1}{2}I + \frac{1}{2}\bar{A} \right)_{xx'} \geq (1 - \alpha) \left( \frac{1}{2}I + \frac{1}{2}\bar{A}_{T_i} \right)_{xx'}, \quad (102)$$

782 where we use the Assumption 2.2. Thus, we have

$$\left( \left( \frac{1}{2}I + \frac{1}{2}\bar{A} \right)^t g_i \right)_{T_i} \geq \frac{1}{2}(1 - \alpha)^{t-1} \left( \frac{1}{2}I + \frac{1}{2}\bar{A}_{T_i} \right)^{t-1} (\bar{A}g_i)_{T_i}, \quad (103)$$

783 here we use  $(\cdot)_{T_i}$  to denote restricting a vector in  $\mathbb{R}^N$  to those dimensions in  $T_i$ .

784 Let vector  $u \in \mathbb{R}^{|T_i|}$  be such that its  $x$ -th dimension is  $\sqrt{w_x}$ ,  $\tilde{u} \in \mathbb{R}^{|T_i|}$  be such that its  $x$ -th dimension  
785 is  $\sqrt{\hat{w}_x}$ . It's standard result that  $u$  is the top eigenvector of  $\bar{A}_{T_i}$  with eigenvalue 1. Let  $v_1$  be the  
786 projection of vector  $(\bar{A}g_i)_{T_i}$  onto  $\tilde{u}$  and  $v_2 = (\bar{A}g_i)_{T_i} - v_1$ . We have

$$\left( \frac{1}{2}I + \frac{1}{2}\bar{A}_{T_i} \right)^{t-1} v_1 = v_1 = \frac{\tilde{u}^\top (\bar{A}g_i)_{T_i} \tilde{u}}{\|\tilde{u}\|^2} \tilde{u} \geq (1 - \alpha) \frac{u^\top (\bar{A}g_i)_{T_i} u}{\|u\|^2} u \geq (1 - \alpha) \rho_i u. \quad (104)$$

787

$$\left\| \left( \frac{1}{2}I + \frac{1}{2}\bar{A}_{T_i} \right)^{t-1} v_2 \right\| \leq \left( 1 - \frac{\lambda_{T_i}}{2} \right)^{t-1} \|v_2\| \leq \left( 1 - \frac{\lambda_{T_i}}{2} \right)^{t-1} \|(\bar{A}g_i)_{T_i}\| \quad (105)$$

$$\leq \left( 1 - \frac{\lambda_{T_i}}{2} \right)^{t-1} \|u\| \leq \left( 1 - \frac{\lambda_{T_i}}{2} \right)^{t-1} \sqrt{\mathcal{P}_{\mathcal{X}}(T_i)}. \quad (106)$$

788 Setting  $\Delta_i = \frac{1}{2}(1 - \alpha)^{t-1} \left( \frac{1}{2}I + \frac{1}{2}\bar{A}_{T_i} \right)^{t-1} v_2$  finishes the proof.  $\square$



789 The following lemma upper bounds the probability that a random walk starting from  $T_i$  arrives at  $S_j$   
 790 for  $j \neq i$ .

791 **Lemma F.4.** Suppose that Assumption 2.2 holds. For every  $i \neq j$  in  $[r]$  and  $t \in [0, \frac{1}{\alpha}]$ , we have

$$\sum_{x \in T_i} \sqrt{w(x)} \left( \left( \frac{1}{2}I + \frac{1}{2}\bar{A} \right)^t g_j \right)_x \leq (t^2 \alpha^2 + t \beta_{i,j}) \mathcal{P}_{\mathcal{X}}(T_i), \quad (107)$$

792 where  $\beta_{i,j} := \phi(T_i, S_j)$ .

793 *Proof of Lemma F.4.* We prove with induction. When  $t = 0$  clearly Equation 107 is true. Assume  
 794 Equation 107 holds for  $t = l$ . Define shorthand

$$g'_j = \left( \frac{1}{2}I + \frac{1}{2}\bar{A} \right)^l g_j. \quad (108)$$

795 We have

$$\sum_{x \in T_i} \sqrt{w(x)} \left( \left( \frac{1}{2}I + \frac{1}{2}\bar{A} \right)^{l+1} g_j \right)_x = \frac{1}{2} \sum_{x \in T_i} \sqrt{w(x)} (g'_j)_x + \underbrace{\frac{1}{2} \sum_{x \in T_i} \sum_{x' \in T_i} \sqrt{w(x)} \bar{A}_{xx'} (g'_j)_{x'}}_{Q_1} \quad (109)$$

$$+ \underbrace{\frac{1}{2} \sum_{x \in T_i} \sum_{x' \in S_j} \sqrt{w(x)} \bar{A}_{xx'} (g'_j)_{x'}}_{Q_2} + \underbrace{\frac{1}{2} \sum_{x \in T_i} \sum_{x' \notin T_i \cup S_j} \sqrt{w(x)} \bar{A}_{xx'} (g'_j)_{x'}}_{Q_3} \quad (110)$$

796 Using Equation 107 at  $t = l$ , we have

$$Q_1 \leq \sum_{x' \in T_i} \sqrt{w(x')} (g'_j)_{x'} \leq (l^2 \alpha^2 + l \beta_{i,j}) \mathcal{P}_{\mathcal{X}}(T_i). \quad (111)$$

797 Lemma E.2 tells us  $(g'_j)_{x'} \leq \sqrt{w(x')}$  for  $x' \in S_j$ , so by the definition of  $\beta_{i,j}$  we have

$$Q_2 \leq \sum_{x \in T_i} \sum_{x' \in S_j} \sqrt{w(x)} \bar{A}_{xx'} \sqrt{w(x')} \leq \beta_{i,j} \mathcal{P}_{\mathcal{X}}(T_i). \quad (112)$$

798 Lemma E.2 also tells us  $(g'_j)_{x'} \leq l \alpha \sqrt{w(x')}$  for  $x' \notin S_j$ , so by Assumption 2.2 we have

$$Q_3 \leq l \alpha \sum_{x \in T_i} \sum_{x' \notin T_i \cup S_j} \sqrt{w(x)} \bar{A}_{xx'} \sqrt{w(x')} \leq l \alpha^2 \mathcal{P}_{\mathcal{X}}(T_i). \quad (113)$$

799 Adding these three terms finishes the proof for  $t = l + 1$ . □

800 Now we use the above lemmas to finish the proof of Theorem F.1.

801 *Proof of Theorem F.1.* For  $i \neq j \in [r]$ , define

$$Q_{i,j} := \left( \left( \tilde{F} \tilde{F}^\top \right)^t g_i - \left( \tilde{F} \tilde{F}^\top \right)^t g_j \right)_{T_i} - \left( \left( \frac{1}{2}I + \frac{1}{2}\bar{A} \right)^t g_i - \left( \frac{1}{2}I + \frac{1}{2}\bar{A} \right)^t g_j \right)_{T_i}. \quad (114)$$

802 Let  $\Delta_i$  be the vector in Lemma F.3, and

$$\Lambda_j := \left( \left( \frac{1}{2}I + \frac{1}{2}\bar{A} \right)^t g_j \right)_{T_i}. \quad (115)$$

803 Using Lemma F.3 and  $t \leq \frac{1}{2\alpha}$ , we know for  $x \in T_i$ ,

$$\left( \left( \tilde{F} \tilde{F}^\top \right)^t g_i - \left( \tilde{F} \tilde{F}^\top \right)^t g_j \right)_x \geq \frac{1}{2} (1 - \alpha)^t \rho \sqrt{w(x)} + (Q_{i,j})_x + (\Delta_i)_x - (\Lambda_j)_x \quad (116)$$

$$\geq \frac{1}{4} \rho_i \sqrt{w(x)} + (Q_{i,j})_x + (\Delta_i)_x - (\Lambda_j)_x, \quad (117)$$

804 where  $\rho_i = \phi(T_i, S_i)$ .

805 When  $g_t(x) = j$ , at least one of  $|(\Delta_i)_x|$ ,  $|(Q_{i,j})_x|$  and  $(\Lambda_j)_x$  is at least  $\frac{1}{12} \rho_i \sqrt{w(x)}$ . Thus, we have

$$\sum_{x \in T_i} w(x) \mathbb{1}[g_t(x) = j] \leq \sum_{x \in T_i} w(x) \mathbb{1} \left[ (\Delta_i)_x^2 \geq \frac{1}{144} \rho_i^2 w(x) \right] + \sum_{x \in T_i} w(x) \mathbb{1} \left[ (Q_{i,j})_x^2 \geq \frac{1}{144} \rho_i^2 w(x) \right] \quad (118)$$

$$+ \sum_{x \in T_i} w(x) \mathbb{1} \left[ (\Lambda_j)_x \geq \frac{1}{12} \rho_i \sqrt{w(x)} \right] \quad (119)$$

$$\leq \frac{144}{\rho_i^2} \|\Delta_i\|_2^2 + \frac{144}{\rho_i^2} \|Q_{i,j}\|_2^2 + \frac{12}{\rho_i} \sum_{x \in T_i} \sqrt{w(x)} \left( \left( \frac{1}{2} I + \frac{1}{2} \bar{A} \right)^t g_j \right)_x \quad (120)$$

806 Using Lemma E.4 we know

$$\|Q_{i,j}\|_2^2 \leq \frac{4\epsilon_t \alpha^2}{\lambda_{k+1}^2} (\mathcal{P}_{\mathcal{X}}(S_i) + \mathcal{P}_{\mathcal{X}}(S_j)), \quad (121)$$

807 where

$$\epsilon_t := (1 - \frac{1}{2} \lambda_{k+1})^{2t}. \quad (122)$$

808 Using Lemma F.3 and Lemma F.2 we know

$$\|\Delta_i\|_2^2 \leq \left( 1 - \frac{\gamma^2}{4} \right)^{2(t-1)} \mathcal{P}_{\mathcal{X}}(T_i). \quad (123)$$

809 Using Lemma F.4 we know

$$\sum_{x \in T_i} \sqrt{w(x)} \left( \left( \frac{1}{2} I + \frac{1}{2} \bar{A} \right)^t g_j \right)_x \leq (t^2 \alpha^2 + t \beta_{i,j}) \mathcal{P}_{\mathcal{X}}(T_i), \quad (124)$$

810 where  $\beta_{i,j} := \phi(T_i, S_j)$ .

811 Let  $\rho := \min_{i \in [r]} \rho_i$ . Plugging Equations (121), (123) and (124) into Equation (120) and summing  
812 over all  $i$  and  $j$  gives

$$\begin{aligned} \sum_{x \in T} w(x) \mathbb{1}[g_t(x) \neq y(x)] &\leq \frac{144r}{\rho^2} \left( 1 - \frac{\gamma^2}{4} \right)^{2(t-1)} \mathcal{P}_{\mathcal{X}}(T) + \frac{1152r\epsilon_t \alpha^2}{\rho^2 \lambda_{k+1}^2} \mathcal{P}_{\mathcal{X}}(S) \\ &\quad + \frac{12rt^2 \alpha^2}{\rho} \mathcal{P}_{\mathcal{X}}(T) + \max_{i \neq j} \left\{ \frac{\beta_{i,j}}{\rho_i} \right\} 12rt \mathcal{P}_{\mathcal{X}}(T). \end{aligned} \quad (125)$$

813 Noticing that  $\rho \geq \tau \alpha^2$  and  $\rho_i \geq \tau \beta_{i,j}$  finishes the proof.

814 □

## 815 G Relaxing Assumption 2.2

816 We introduce the following relaxed version of Assumption 2.2. Intuitively, it says that after ignoring  $\zeta$   
817 proportion of data, the remaining data satisfies the nice clustering structure stated in Assumption 2.2.

**Assumption G.1** (Cross-cluster connections with noise, relaxation of Assumption 2.2). *For some  $\alpha \in (0, 1)$ , we assume that the vertices of the positive-pair graph  $G$  can be partition into  $m + 1$  disjoint clusters  $C_1, \dots, C_{m+1}$  such that for any  $i \in [m]$ ,*

$$\bar{\phi}(C_i, \mathcal{X} \setminus C_i) \leq \alpha, \quad (126)$$

*and the last cluster satisfies*

$$\mathcal{P}_{\mathcal{X}}(C_{m+1}) \leq \zeta. \quad (127)$$

Intuitively,  $C_{m+1}$  contains all the outliers in the data distribution that doesn't cleanly belong to a semantic cluster. We will work in a regime where the source and target classes are disjoint clusters among  $C_1, \dots, C_m$ , but the noise data  $C_{m+1}$  also exists during the self-supervised contrastive learning.

In the rest of this section, we will prove the following theorem, which is a relaxed version of Theorem F.1

**Theorem G.2.** *Suppose Assumptions G.1, 3.3 and 2.3 hold and  $P_{\mathcal{X}}(S)/P_{\mathcal{X}}(T) \leq O(1)$ . Let  $g_t$  be defined the same as in Theorem 3.2. Then, for any  $1 \leq t \leq \frac{1}{\alpha}$ , we have*

$$\mathcal{E}_T(g_t) \lesssim \frac{r}{\lambda_{k+1}^2} \cdot \max \left\{ \frac{1}{\tau^2 \alpha^4} \left(1 - \frac{1}{4} \min\{\gamma^2, \lambda_{k+1}\}\right)^t, \frac{t^2}{\tau}, \frac{t\zeta}{\rho \cdot \mathcal{P}_{\mathcal{X}}(T)} \right\}, \quad (128)$$

where  $\lambda_{k+1}$  is the  $k+1$ -th smallest eigenvalue of the Laplacian of the positive-pair graph, and  $\rho = \min_{i \in [r]} \phi(T_i, S_i)$ .

**The effect of noise in data:** To see how much the noise (i.e., the existence of  $C_{m+1}$ ) influences the result, we can consider a typical setting where the probability of target domain is on the constant level, i.e.,  $\mathcal{P}_{\mathcal{X}}(T) \geq \Omega(1)$ . Furthermore, notice that  $t$  usually only needs to be set as a small integer, let's assume  $t$  is on the order of constant ( $t \leq O(1)$ ). In this case, so long as  $\zeta \ll \rho = \min_{i \in [r]} \phi(T_i, S_i)$ , the additional term due to noise is negligible. This suggests that **our analysis is robust to “outliers” in the data distribution, so long as the total amount of connections to outliers is smaller than the amount of connections between corresponding source-target classes.**

We note that assuming  $\zeta$  being smaller than  $\phi(T_i, S_i)$  is to some extent necessary for domain adaptation to succeed. Otherwise, one can construct a set of “adversarial” outliers that connect to both a target domain  $T_i$  and an incorrent source domain  $S_j$  where  $j \neq i$ . In this case, any natural domain adaptation algorithm would think  $T_i$  is closer to  $S_j$  rather than  $S_i$ , hence misclassify those data in the target domain  $T_i$ .

We will prove Theorem G.2 using the a similar plan as Theorem F.1. First, we note that Lemma F.2 doesn't rely on Assumption 2.2 so it still holds in this setting. We also note that Lemma F.3 only uses max-expansion of  $T_i$  which is still true under Assumption G.1, so Lemma F.3 also holds.

We introduce the following relaxed version of Lemma E.2

**Lemma G.3** (Relaxation of Lemma E.2). *Suppose Assumption G.1 holds. For every  $i \in [m]$ , define  $g_i \in \mathbb{R}^N$  be such that the  $x$ -th dimension of it is*

$$(g_i)_x = \begin{cases} \sqrt{w(x)} & \text{if } x \in C_i \\ 0 & \text{otherwise} \end{cases} \quad (129)$$

*Then, for any two clusters  $i \neq j$  in  $[m]$ , the following holds for any integer  $t \in [0, \frac{1}{\alpha}]$ :*

• *For any  $x \in \mathcal{X}$ , we have*

$$\left( \left( \frac{1}{2}I + \frac{1}{2}\bar{A} \right)^t g_i \right)_x \leq \sqrt{w(x)}. \quad (130)$$

• *For any  $x \notin C_i \cup C_{m+1}$ , we have*

$$\left( \left( \frac{1}{2}I + \frac{1}{2}\bar{A} \right)^t g_i \right)_x \in \left[ 0, t\alpha\sqrt{w(x)} + \frac{t\Delta_x^t}{\sqrt{w(x)}} \right], \quad (131)$$

where  $\Delta^t \in \mathbb{R}^N$  satisfies  $\sum_{x \in \mathcal{X}} \Delta_x^t \leq \zeta$  and  $\Delta_x^t \geq 0$ .

854 *Proof of Lemma G.3.* We prove this lemma by induction. When  $t = 0$ , obviously equations (130)  
855 and (131) are all true. Assume they are true for  $t = l$ , we prove that they are still true at  $t = l + 1$  so  
856 long as  $l \leq \frac{1}{\alpha}$ . We define shorthands  $g'_i = (\frac{1}{2}I + \frac{1}{2}\bar{A})^l g_i$  and  $g'_j = (\frac{1}{2}I + \frac{1}{2}\bar{A})^l g_j$ .  
857 For the induction of Equation (130), we have

$$\sqrt{w(x)} (\bar{A}g'_i)_x = \sum_{\tilde{x} \in \mathcal{X}} \frac{w(x, \tilde{x})}{\sqrt{w(\tilde{x})}} (g'_i)_{\tilde{x}} \leq \sum_{\tilde{x} \in \mathcal{X}} \frac{w(x, \tilde{x})}{\sqrt{w(\tilde{x})}} \sqrt{w(\tilde{x})} = w(x), \quad (132)$$

858 where the inequality uses Equations (130) at  $t = l$ .

859 For the induction of Equation (131), let  $x \notin C_i$ . Since  $\bar{A}$  and  $g_i$  are both element-wise nonnegative,  
860 we have  $\bar{A}g'_i$  is element-wise nonnegative, hence  $(\bar{A}g'_i)_x \geq 0$ . On the other hand, we have

$$\begin{aligned} \sqrt{w(x)} (\bar{A}g'_i)_x &= \sum_{\tilde{x} \in C_i} \frac{w(x, \tilde{x})}{\sqrt{w(\tilde{x})}} (g'_i)_{\tilde{x}} + \sum_{\tilde{x} \notin C_i \cup C_{m+1}} \frac{w(x, \tilde{x})}{\sqrt{w(\tilde{x})}} (g'_i)_{\tilde{x}} + \sum_{\tilde{x} \in C_{m+1}} \frac{w(x, \tilde{x})}{\sqrt{w(\tilde{x})}} (g'_i)_{\tilde{x}} \quad (133) \\ &\leq \sum_{\tilde{x} \in C_i} \frac{w(x, \tilde{x})}{\sqrt{w(\tilde{x})}} \sqrt{w(\tilde{x})} + \sum_{\tilde{x} \notin C_i \cup C_{m+1}} \frac{w(x, \tilde{x})}{\sqrt{w(\tilde{x})}} \left( l\alpha \sqrt{w(\tilde{x})} + \frac{l\Delta_{\tilde{x}}^l}{\sqrt{w(\tilde{x})}} \right) + \sum_{\tilde{x} \in C_{m+1}} \frac{w(x, \tilde{x})}{\sqrt{w(\tilde{x})}} \sqrt{w(\tilde{x})} \quad (134) \end{aligned}$$

$$\leq (l+1)\alpha w(x) + l \sum_{\tilde{x} \notin C_i \cup C_{m+1}} \frac{w(x, \tilde{x})}{w(\tilde{x})} \Delta_{\tilde{x}}^l + \sum_{\tilde{x} \in C_{m+1}} w(x, \tilde{x}), \quad (135)$$

861 where the first inequality uses Equations (130) and (131) at  $t = l$ , and the second inequality is by  $\alpha$   
862 max-expansion. Define

$$\bar{\Delta}_x^{l+1} = \frac{l}{l+1} \sum_{\tilde{x} \notin C_i \cup C_{m+1}} \frac{w(x, \tilde{x})}{w(\tilde{x})} \Delta_{\tilde{x}}^l + \frac{1}{l+1} \sum_{\tilde{x} \in C_{m+1}} w(x, \tilde{x}), \quad (136)$$

863 we have

$$\sum_{x \in \mathcal{X}} \bar{\Delta}_x^{l+1} \leq \frac{l}{l+1} \sum_{\tilde{x} \in \mathcal{X}} \Delta_{\tilde{x}}^l + \frac{1}{l+1} \zeta \leq \zeta. \quad (137)$$

864 Setting  $\Delta_x^{l+1} = \frac{1}{2}\Delta_x^l + \frac{1}{2}\bar{\Delta}_x^{l+1}$  finishes the proof.  $\square$

865 Now we use the above lemma to prove a generalized version of Lemma F.4.

866 **Lemma G.4** (Relaxation of Lemma F.4). *Suppose that Assumption G.1 holds. For every  $i \neq j$  in  $[r]$*   
867 *and  $t \in [0, \frac{1}{\alpha}]$ , we have*

$$\sum_{x \in T_i} \sqrt{w(x)} \left( \left( \frac{1}{2}I + \frac{1}{2}\bar{A} \right)^t g_j \right)_x \leq (t^2\alpha^2 + t\beta_{i,j})\mathcal{P}_{\mathcal{X}}(T_i) + 2t\zeta, \quad (138)$$

868 where  $\beta_{i,j} := \phi(T_i, S_j)$ .

869 *Proof of Lemma G.4.* We prove with induction. When  $t = 0$  clearly Equation 138 is true. Assume  
870 Equation 138 holds for  $t = l$ . Define shorthand

$$g'_j = \left( \frac{1}{2}I + \frac{1}{2}\bar{A} \right)^l g_j. \quad (139)$$

871 We have

$$\sum_{x \in T_i} \sqrt{w(x)} \left( \left( \frac{1}{2}I + \frac{1}{2}\bar{A} \right)^{l+1} g_j \right)_x = \frac{1}{2} \sum_{x \in T_i} \sqrt{w(x)} (g'_j)_x + \underbrace{\frac{1}{2} \sum_{x \in T_i} \sum_{x' \in T_i} \sqrt{w(x)} \bar{A}_{xx'} (g'_j)_{x'}}_{Q_1} \quad (140)$$

$$+ \underbrace{\frac{1}{2} \sum_{x \in T_i} \sum_{x' \in S_j} \sqrt{w(x)} \bar{A}_{xx'} (g'_j)_{x'}}_{Q_2} + \underbrace{\frac{1}{2} \sum_{x \in T_i} \sum_{x' \notin T_i \cup S_j \cup C_{m+1}} \sqrt{w(x)} \bar{A}_{xx'} (g'_j)_{x'}}_{Q_3} \quad (141)$$

$$+ \underbrace{\frac{1}{2} \sum_{x \in T_i} \sum_{x' \in C_{m+1}} \sqrt{w(x)} \bar{A}_{xx'} (g'_j)_{x'}}_{Q_4} \quad (142)$$

872 Using Equation 138 at  $t = l$ , we have

$$Q_1 \leq \sum_{x' \in T_i} \sqrt{w(x')} (g'_j)_{x'} \leq (l^2 \alpha^2 + l \beta_{i,j}) \mathcal{P}_{\mathcal{X}}(T_i). \quad (143)$$

873 Lemma G.3 tells us  $(g'_j)_{x'} \leq \sqrt{w(x')}$  for  $x' \in S_j$ , so by the definition of  $\beta_{i,j}$  we have

$$Q_2 \leq \sum_{x \in T_i} \sum_{x' \in S_j} \sqrt{w(x)} \bar{A}_{xx'} \sqrt{w(x')} \leq \beta_{i,j} \mathcal{P}_{\mathcal{X}}(T_i), \quad (144)$$

874 and

$$Q_4 \leq \sum_{x \in T_i} \sum_{x' \in C_{m+1}} \sqrt{w(x)} \bar{A}_{xx'} \sqrt{w(x')} \leq \zeta. \quad (145)$$

875 Lemma G.3 also tells us  $(g'_j)_{x'} \leq l\alpha \sqrt{w(x')} + \frac{l\Delta_{x'}}{\sqrt{w(x')}} for  $x' \notin S_j$ , where  $\sum_{x' \in \mathcal{X}} \Delta_{x'} \leq \zeta$ . Thus,  
876 by Assumption G.1 we have$

$$Q_3 \leq l\alpha \sum_{x \in T_i} \sum_{x' \notin T_i \cup S_j \cup C_{m+1}} \sqrt{w(x)} \bar{A}_{xx'} \sqrt{w(x')} + l \sum_{x \in T_i} \sum_{x' \notin T_i \cup S_j \cup C_{m+1}} \frac{w(x, x')}{w(x')} \Delta_{x'} \quad (146)$$

$$\leq l\alpha^2 \mathcal{P}_{\mathcal{X}}(T_i) + l\alpha \zeta. \quad (147)$$

877 Adding these three terms finishes the proof for  $t = l + 1$ .  $\square$

878 We use the above lemma to prove Theorem G.2.

879 *Proof of Theorem G.2.* The proof is exactly the same as Theorem F.1 before Equation (124). Using  
880 Lemma F.4 we know

$$\sum_{x \in T_i} \sqrt{w(x)} \left( \left( \frac{1}{2}I + \frac{1}{2}\bar{A} \right)^t g_j \right)_x \leq (t^2 \alpha^2 + t \beta_{i,j}) \mathcal{P}_{\mathcal{X}}(T_i) + t\zeta, \quad (148)$$

881 where  $\beta_{i,j} := \phi(T_i, S_j)$ . Notice that the only difference from Equation (124) is the additional  $t\zeta$   
882 term, which in turn leads to an additional  $\frac{12rt\zeta}{\rho}$  term in Equation (125) and finishes the proof.  $\square$
